# Supplementary material
Source: PubMed Central journal article supplement (PMC3462501)
Supplement: supp_WNL.0b013e3181d0cc8b_bigal.pdf [file supp_WNL.0b013e3181d0cc8b_bigal.pdf]

# Emicrania e malattie cardiovascolari

## Uno studio di popolazione

M.E. Bigal,  
T. Kurth,  
N. Santanello,  
D. Buse,  
W. Golden,  
M. Robbins,  
R.B. Lipton

Indirizzare  
la corrispondenza  
e la richiesta di ristampe a:  
Dr. Marcelo E. Bigal,  
1 Merck Dr., PO Box 100,  
Whitehouse Station,  
NJ 08889-0100  
marcelo\_bigal@merck.com

### ABSTRACT

**Obiettivi:** Per quanto la relazione tra l'emicrania e le malattie cardiovascolari (CVD) sia stata studiata, diverse questioni restano senza soluzione. In questo lavoro sono stati confrontati i tassi delle CVD diagnostiche, nonché dei fattori di rischio di CVD, in soggetti affetti da emicrania con e senza aura (MA e MO) e nei controlli.

**Metodi:** In questo studio caso-controllo, sono stati selezionati soggetti con emicrania (n=6.102) e controlli (n=5.243) rappresentativi della popolazione adulta degli USA. La diagnosi di cefalea è stata formalmente assegnata utilizzando un questionario postale validato che ha acquisito dati anche su trattamento, comorbidità ed altre variabili. I dati relativi agli eventi CVD sono stati ottenuti in base alla diagnosi medica riferita dai soggetti intervistati. Sono stati calcolati i fattori di rischio di CVD ed i punteggi di Framingham modificati.

**Risultati:** Nelle analisi non aggiustate, l'emicrania in generale e la MA sono risultate associate ad infarto miocardico, ictus e claudicatio, mentre la MO è stata associata ad infarto miocardico e claudicatio. Rispetto ai controlli, i soggetti emicranici avevano una maggiore probabilità di avere una diagnosi medica di diabete [12,6% vs 9,4%, odds ratio (OR) 1,4, intervallo di confidenza (IC) al 95% 1,2-1,6], di ipertensione (33,1% vs 27,5%, OR 1,4, IC 95% 1,3-1,6) e di ipercolesterolemia (32,7% vs 25,6%, OR 1,4, IC 95% 1,3-1,5). Il rischio è risultato più elevato nella MA, ma è rimasto elevato nella MO. I punteggi di Framingham sono risultati significativamente più elevati nei soggetti con MO e MA rispetto ai controlli. Dopo correzione (per sesso, età, disabilità, trattamento, fattori di rischio di CVD), l'emicrania è rimasta significativamente associata all'infarto miocardico (OR 2,2, IC 95% 1,7-2,8), all'ictus (OR 1,5, IC 95% 1,2-2,1) e alla claudicazione (OR 2,69, IC 95% 1,98-3,23).

**Conclusioni:** Sia l'emicrania con aura che l'emicrania senza aura sono associate alle malattie cardiovascolari (CVD) ed ai fattori di rischio di CVD. Comunque, considerate le grandi dimensioni del nostro campione, la rilevanza clinica di tali differenze deve essere ancora stabilita.

**Neurology® 2010; 74:628-635**

### GLOSSARIO

**AMPP** = American Migraine Prevalence and Prevention; **IC** = Intervallo di confidenza; **CVD** = Malattia cardiovascolare; **ETTH** = Cefalea di tipo tensivo episodica (Episodic Tension Type Headache); **MA** = Emicrania con aura; **MO** = Emicrania senza aura; **OR** = Odds ratio.

L'associazione tra l'emicrania e le malattie cardiovascolari (CVD), compreso l'ictus ischemico e le lesioni cerebrali subcliniche, è ben stabilita almeno per l'emicrania con aura (MA) (1-6). La MA sembra essere inoltre associata alla cardiopatia ischemica, alla claudicatio e alla mortalità cardiovascolare (7-9). In sostanza, è stato ipotizzato che l'emicrania possa essere un fattore di rischio per la patologia aterosclerotica in generale (10).

Tra i molti meccanismi biologicamente plausibili che legano l'emicrania alle CVD, è stato suggerito che le persone affette da MA abbiano una prevalenza più elevata di fattori di rischio di CVD (11), oltre a specifici genotipi associati alle CVD (12-14). Ciò nonostante, diverse questioni rimangono senza soluzione. In primo luogo, non è chiaro se la MA e l'emicrania

*e-Pub ahead of print on February 10, 2010, at [www.neurology.org](http://www.neurology.org).*

From Scientific Affairs-Neuroscience (M.E.B.), Department of Outcomes Research (N.S.), and Epidemiology (W.G.), Merck Research Laboratories, Whitehouse Station, NJ; Departments of Neurology (M.E.B., D.B., M.R., R.B.L.) and Epidemiology and Population Health (R.B.L.), Albert Einstein College of Medicine, Bronx, NY; Division of Preventive Medicine (T.K.), Department of Medicine, Brigham and Women's Hospital, Harvard Medical School, Boston, MA; and The Montefiore Headache Center (R.B.L.), Bronx, NY.

**Study funding:** The AMPP was established and initially funded by The National Headache Foundation through a grant from Ortho-McNeil Neurologics, Inc. It is currently cofunded by Merck & Co. Inc.

**Disclosure:** Author disclosures are provided at the end of the article.

senza aura (MO) siano entrambe dei fattori di rischio di CVD, oppure se l'associazione sia specifica per la MA. In secondo luogo, nella maggior parte degli studi l'emigrania è stata accertata sulla base della diagnosi medica riferita dai soggetti interpellati (anche se questi metodi sono stati validati) (3,7).

Nell'ambito dello studio American Migraine Prevalence and Prevention (AMPP), 120.000 famiglie americane, rappresentative della popolazione degli USA, sono state seguite in follow-up per 5 anni (15-17). Di conseguenza, approfittando della precisa caratterizzazione delle cefalee nel protocollo dello studio AMPP, abbiamo riesaminato i partecipanti utilizzando gli stessi strumenti ben validati del Women's Health Study per la valutazione del rischio di CVD (7), allo scopo di: 1) descrivere i fattori di rischio di CVD nei soggetti emigranici e nei controlli; 2) accertare gli eventi cardiovascolari nei soggetti con emigrania rispetto ai controlli; e 3) valutare la relazione tra MA e MO e le CVD sia negli uomini che nelle donne in un'ampia fascia di età.

**METODI** **Popolazione di studio.** AMPP è uno studio longitudinale su individui affetti da emigrania selezionati da un campione rappresentativo della popolazione generale. Lo studio AMPP è costituito da 2 fasi principali. Nella fase 1 (fase di screening) abbiamo utilizzato un questionario autocompilato validato di screening per individuare un campione rappresentativo a livello nazionale dei soggetti affetti da emigrania grave (16). Il questionario di screening è stato spedito nel 2004 ad un campione random stratificato di 120.000 famiglie americane, estratte da un campione nazionale di 600.000 famiglie.

Nella fase 2, abbiamo selezionato un campione random di 24.000 persone affette da emigrania per uno studio con follow-up di 5 anni. Gli obiettivi della fase 2 comprendevano una misurazione dell'incidenza di emigrania, nonché lo studio della prognosi dell'emigrania e dei fattori di rischio di progressione della malattia (18).

In questa sede, riportiamo i risultati della nostra indagine del 2008. Poiché i controlli sono stati identificati nel 2004, ma da allora non sono stati più riesaminati, abbiamo condotto una seconda indagine su un campione di 10.000 persone che hanno negato di essere affette da cefalea nel 2004. Questi soggetti, che sono rimasti liberi da cefalea, costituiscono il gruppo di controllo.

**Descrizione dell'indagine.** Il questionario comprendeva 82 domande, che hanno stimato la diagnosi di cefalea, la presenza di comorbidità, l'impatto associato alla cefalea, la qualità di vita correlata alla salute, le caratteristiche demografiche e altre informazioni di interesse. Il modulo della cefalea consiste in 21 domande per ciascuno dei 3 tipi di cefalea, validate in un precedente studio ed utilizzate ogni anno nello studio AMPP (19).

La diagnosi di MA e di MO, nonché di altre forme di cefalea, è stata effettuata sulla base delle risposte fornite, in conformità con i criteri della Seconda Edizione della Classificazione Internazionale delle Cefalee (International

Classification of Headache) (20). In precedenza, è stato dimostrato che l'indagine ha una sensibilità del 100% ed una specificità dell'82,3% per la diagnosi di emigrania (19). Come parte dell'indagine, ai soggetti sono state rivolte numerose domande sulla disabilità (Migraine Disability Assessment Questionnaire), sulle comorbidità e sul trattamento acuto e preventivo dell'emigrania, come descritto in dettaglio altrove (21).

Per i controlli, l'indagine consisteva nello stesso modulo validato di cefalea sopra descritto (21 domande), con caratterizzazione demografica e valutazione del loro profilo cardiovascolare (vedi più avanti). I controlli avevano un'anamnesi negativa per emigrania, emigrania probabile o cefalee croniche quotidiane [è stata accettata un'anamnesi di cefalea di tipo tensivo episodica (ETTH)] e non avevano sofferto di cefalea nell'ultimo anno (senza ETTH nell'ultimo anno).

**Valutazione degli eventi cardiovascolari.** Sono state poste domande in merito agli eventi cardiovascolari dichiarati (infarto miocardico, ictus, attacchi ischemici transitori, rivascolarizzazione coronarica, claudicatio), nonché sulla diagnosi medica di ciascuno di questi eventi (es. "Le è mai stato detto da un medico di avere avuto un attacco cardiaco?"). Poiché i risultati di entrambe le forme di valutazione sono stati molto simili, si è scelto di riportare in questa sede solo le stime più prudenti sulla diagnosi medica. Per ciascun evento, è stato chiesto al soggetto se aveva mai avuto l'evento e, di conseguenza, per ogni evento sono stati accertati il mese e l'anno dell'evento stesso. Abbiamo seguito lo stesso linguaggio come pure gli stessi metodi ben stabiliti del Women's Health Study (7) e del Physicians' Health Study (8), che hanno convalidato questo metodo validando gli eventi CV attraverso una revisione delle cartelle cliniche.

**Valutazione del profilo cardiovascolare.** Oltre a raccogliere informazioni sulle CVD, sono state ottenute informazioni su fattori di rischio stabiliti per le CVD (es. fumo, indice di massa corporea, ipertensione). Il profilo cardiovascolare è stato valutato anche con il convalidato punteggio di rischio di Framingham, modificato (22). Questo punteggio viene calcolato in base ai dati dichiarati su pressione arteriosa, livello di colesterolo, diabete e fumo di sigaretta, e non include gli esami di laboratorio come il profilo lipidico. Nello studio di validazione, il punteggio ha mostrato una buona discriminazione [statistica C, 0,763 (uomini) e 0,793 (donne)] e calibrazione. La specificità è stata pari a circa l'84% e il punteggio correla eccezionalmente bene con la tradizionale valutazione del rischio secondo Framingham. Il punteggio di rischio di Framingham è ben calibrato per predire il rischio assoluto di un primo evento coronarico nelle popolazioni degli Stati Uniti (23). Altri studi suggeriscono inoltre che l'autovalutazione del rischio di CVD predica in modo indipendente la morte per CVD (24).

**Analisi.** I soggetti di controllo sono stati confrontati con i gruppi affetti da cefalea in termini di rischio di CVD, presenza di fattori di rischio di CVD, e punteggi di rischio secondo Framingham. Per tutti gli outcome, ad eccezione dei punteggi di Framingham, sono stati impiegati modelli logistici. Nel caso dei punteggi di Framingham, sono stati utilizzati modelli lineari gaussiani. In tutti i confronti, i soggetti di controllo sono stati considerati quale riferimento; pertanto, gli odds ratio (OR) e le differenze medie riportate riflettono la differenza di probabilità o delle medie tra controlli ed il gruppo principale con la cefalea. Queste analisi esplorative sono state stratificate in base al sesso, età, razza ed indice di massa corporea. Ove perti-

nente, la stratificazione è stata effettuata anche in funzione della disabilità da cefalea (misurata con il questionario MIDAS), e per l'uso di triptani. Per un sottoinsieme selezionato di fattori di rischio (infarto ed ictus), le analisi stratificate sono state ampliate con una serie di modelli ad effetti principali, con aggiustamento per una serie di covariate. Le covariate impiegate includevano i fattori di rischio di CVD (diabete, ipertensione, fumo, ipercolesterolemia), come pure l'indice di massa corporea, il sesso e l'età. Per tutte le analisi è stato utilizzato il sistema SAS.

**Approvazioni del protocollo standard, registrazioni e consenso del paziente.** Lo studio AMPP, in tutte le sue forme, è stato approvato dal Comitato di Revisione della ricerca dell'Albert Einstein College of Medicine, e ricertificato annualmente dal Comitato di Revisione istituzionale. I partecipanti sono volontari di un campione rappresentativo che hanno fornito il consenso a partecipare alla presente ricerca.

**RISULTATI** Abbiamo condotto un'indagine su 9.107 individui della coorte con l'emigrania e 10.000 controlli potenzialmente idonei. Risposte complete sono state ottenute da 6.102 soggetti con emigrania (67%) e da 5.243 controlli (tasso di risposta del 52,4%). I soggetti *responder* e *non-responder* non differivano significativamente in termini di caratteristiche demografiche. Le caratteristiche demografiche sono riportate nella tabella e-1 sul sito web di Neurology@ www.neurology.org. Rispetto ai controlli, i soggetti emigranici avevano una maggiore probabilità di essere donne (80,3% vs 53%,  $p < 0,0001$ ) e di avere un reddito più basso ( $p < 0,001$ ). I controlli erano più giovani (età mediana = 20,4 vs 24,0) ( $p < 0,01$ ).

**Eventi cardiovascolari. Associazioni univariate.** La Tabella 1 mostra le frequenze di diagnosi medica degli eventi cardiovascolari nei soggetti emigranici e nei controlli. Nell'emigrania in generale e nella MA, i tassi di attacco cardiaco, di ictus e di claudicatio sono risultati più elevati. Nel caso della MO, sono risultati più elevati i tassi di attacco cardiaco e di claudicatio, ma non quelli di ictus. I tassi sono stati più elevati nella MA che nella MO.

Nel caso dell'infarto miocardico, l'emigrania in generale è stata associata ad un rischio significativamente aumentato rispetto ai controlli per tutte le età superiori ai 39 anni. L'infarto miocardico si è verificato nell'1,9% dei controlli e nel 4,1% dei soggetti emigranici [OR 2,2, intervallo di confidenza (IC) al 95% 1,7-2,7]. Gli OR sono stati più alti nei gruppi di età dai 30 ai 39 anni e dai 40 ai 49 anni (3,5 e 4,2) e sono diminuiti (sebbene siano rimasti significativamente elevati) nelle età successive. I tassi sono risultati significativamente aumentati negli uomini (OR 3,3, IC 95% 2,4-4,6) e nelle donne (OR 2,3, IC 95% 1,6-3,3). I tassi sono aumentati in misura significativa nei soggetti di razza bianca (OR 2,1, IC 95% 1,6-2,7) ed in misura non significativa nei soggetti di razza nera. I rapporti sono aumentati ulteriormente nella MA rispetto ai controlli: uomini = 3,7

(2,4-5,7); donne = 3,5 (2,4-5,2). Il rischio è stato più elevato nei gruppi di età di 30-39 anni (OR 8,6, IC 95% 2,2-33,4) e di 40-49 anni (OR 4,1, IC 95% 1,5-11,2). Il rischio è risultato elevato anche nella MO rispetto ai controlli: in generale (OR 1,8, IC 95% 1,4-2,3), negli uomini (OR 3,1, IC 95% 2,1-4,4) e nelle donne (OR 1,7, IC 95% 1,2-2,6). Il rischio più alto è stato osservato nelle donne e nei soggetti di età compresa tra 40 e 49 anni (OR 4,4, IC 95% 1,7-10,9).

L'ictus si è verificato nell'1,2% dei controlli e nel 2,1% dei soggetti emigranici (OR 1,61, IC 95% 1,2-2,2). I tassi sono stati pari al 3,9% nella MA (OR 3,1, IC 95% 2,2-4,4) e all'1,12% nella MO (OR 0,9, IC 95% 0,6-1,3). I tassi della MA sono risultati elevati in entrambi i sessi ed in tutti i gruppi di età superiore ai 30 anni. Nella MO, il rischio non è risultato significativamente differente (per il sesso o per qualunque gruppo di età). Tuttavia, il numero degli eventi è limitato, e ciò rende difficile una comparazione in alcuni di questi sottogruppi.

Infine, per quanto riguarda la claudicazione, il rischio è aumentato nell'emigrania in totale (2,57% vs 0,9%, OR 2,9, IC 95% 2,1-3,9) ed in entrambi i sottotipi di emigrania. Nella MA, il rischio è risultato significativamente aumentato in entrambi i sessi e le razze, ed in tutte le età superiori ai 30 anni. Nel caso della MO, il rischio è risultato significativamente elevato negli uomini e nei soggetti di razza bianca, e ha mostrato una tendenza alla significatività in altre categorie (Tabella 1).

La figura 1 mostra gli odds ratio per la presenza di uno qualsiasi dei possibili eventi cardiovascolari valutati nel nostro studio, nella MA e nella MO rispetto ai controlli. Come illustrato, la grandezza dell'associazione è maggiore nella MA, ma è significativa anche nel caso della MO negli uomini e nei soggetti di razza bianca, ma non nelle altre categorie.

**Fattori di rischio per le malattie cardiovascolari.** La tabella e-2 confronta i tassi di noti fattori di rischio cardiovascolare in funzione dello stato dell'emigrania, stratificato in base alle caratteristiche demografiche. In generale, rispetto ai controlli, i soggetti emigranici avevano una maggiore probabilità di avere una diagnosi medica di diabete (12,6% vs 9,4%, OR 1,4, IC 95% 1,2-1,6), di ipertensione (33,1% vs 27,5%, OR 1,4, IC 95% 1,3-1,6) e di ipercolesterolemia (32,7% vs 25,6%, OR 1,4, IC 95% 1,3-1,5). Anche se la probabilità di fumare è stata significativamente più elevata nei soggetti affetti da emigrania, le differenze sono state modeste, e la significatività riflette probabilmente le grandi dimensioni del nostro campione.

La MA è risultata significativamente associata a tutti i fattori di rischio. La MO è risultata significativamente associata con il diabete, l'ipertensione e l'ipercolesterolemia, ma non con il fumo. Sebbene l'entità dell'associazione sia stata più

elevata per la MA che per la MO (Tabella E-2), le differenze non sono state così grandi come quelle osservate nel caso delle CVD, come elencato nella tabella 1.

La figura 2 mostra gli odds ratio per la presenza di almeno 2 dei 4 fattori di rischio valutati, nella MA e nella MO, rispetto ai controlli. Sia i soggetti con MA che quelli con MO avevano, con una probabilità significativamente maggiore rispetto ai controlli, più di un fattore di rischio

cardiovascolare, per la maggior parte delle categorie demografiche.

**Valutazione del rischio cardiovascolare: punteggi di Framingham.** La figura 3 mostra il punteggio di Framingham per l'emicrania in generale, la MA e la MO, nonché per il sesso e per l'età. Nel complesso, i punteggi di rischio sono stati significativamente più elevati in tutti i soggetti emicranici (media 10,7, DS 5,4), nella MA (11,0, 5,4) e nel-

**Tabella 1** Eventi cardiovascolari in funzione del tipo di emicrania e delle caratteristiche demografiche

|                         | Controlli,<br>n (%) | Emicrania<br>totale,<br>n (%) | OR* (IC 95%)      | Emicrania<br>con aura,<br>n (%) | OR* (IC 95%)        | Emicrania<br>senza aura,<br>n (%) | OR* (IC 95%)      |
|-------------------------|---------------------|-------------------------------|-------------------|---------------------------------|---------------------|-----------------------------------|-------------------|
| <b>Attacco cardiaco</b> |                     |                               |                   |                                 |                     |                                   |                   |
| <b>Totale</b>           | 100 (1,91)          | 249 (4,08)                    | 2,19 (1,73–2,77)  | 110 (5,50)                      | 2,99 (2,27–3,95)    | 139 (3,39)                        | 1,80 (1,39–2,34)  |
| <b>Maschi</b>           | 61 (2,47)           | 92 (7,65)                     | 3,27 (2,35–4,55)  | 33 (8,59)                       | 3,71 (2,39–5,74)    | 59 (7,21)                         | 3,06 (2,12–4,42)  |
| <b>Femmine</b>          | 39 (1,40)           | 157 (3,20)                    | 2,32 (1,63–3,31)  | 77 (4,77)                       | 3,52 (2,38–5,19)    | 80 (2,44)                         | 1,75 (1,19–2,58)  |
| <b>18–29 aa</b>         | 3 (0,36)            | 1 (0,32)                      | 0,88 (0,09–8,52)  | 1 (1,30)                        | 3,67 (0,38–35,73)   | 0 (0,00)                          | Non disponibile   |
| <b>30–39 aa</b>         | 3 (0,28)            | 10 (0,98)                     | 3,55 (0,98–12,95) | 7 (2,34)                        | 8,59 (2,21–33,42)   | 3 (0,42)                          | 1,50 (0,30–7,46)  |
| <b>40–49 aa</b>         | 6 (0,45)            | 30 (1,88)                     | 4,25 (1,76–10,25) | 10 (1,80)                       | 4,07 (1,47–11,25)   | 20 (1,92)                         | 4,35 (1,74–10,87) |
| <b>50–59 aa</b>         | 24 (2,42)           | 96 (5,05)                     | 2,15 (1,36–3,38)  | 51 (7,76)                       | 3,40 (2,07–5,58)    | 45 (3,62)                         | 1,52 (0,92–2,51)  |
| <b>60–69 aa</b>         | 64 (6,46)           | 112 (8,84)                    | 1,40 (1,02–1,93)  | 41 (10,02)                      | 1,61 (1,07–2,43)    | 71 (8,28)                         | 1,31 (0,92–1,86)  |
| <b>Bianchi</b>          | 85 (1,94)           | 214 (3,96)                    | 2,09 (1,62–2,69)  | 88 (5,07)                       | 2,70 (1,99–3,66)    | 126 (3,44)                        | 1,80 (1,36–2,38)  |
| <b>Neri</b>             | 12 (1,97)           | 13 (3,44)                     | 1,77 (0,80–3,93)  | 7 (4,90)                        | 2,56 (0,99–6,62)    | 6 (2,55)                          | 1,30 (0,48–3,51)  |
| <b>Altre razze</b>      | 3 (1,20)            | 22 (6,79)                     | 5,97 (1,77–20,19) | 15 (12,61)                      | 11,83 (3,35–41,72)  | 7 (3,41)                          | 2,90 (0,74–11,36) |
| <b>Ictus</b>            |                     |                               |                   |                                 |                     |                                   |                   |
| <b>Totale</b>           | 66 (1,26)           | 123 (2,02)                    | 1,61 (1,19–2,18)  | 77 (3,85)                       | 3,14 (2,25–4,38)    | 46 (1,12)                         | 0,89 (0,61–1,30)  |
| <b>Maschi</b>           | 27 (1,10)           | 25 (2,08)                     | 1,92 (1,11–3,32)  | 16 (4,17)                       | 3,93 (2,10–7,36)    | 9 (1,10)                          | 1,00 (0,47–2,14)  |
| <b>Femmine</b>          | 39 (1,40)           | 98 (2,00)                     | 1,43 (0,99–2,08)  | 61 (3,78)                       | 2,76 (1,84–4,14)    | 37 (1,13)                         | 0,80 (0,51–1,26)  |
| <b>18–29 aa</b>         | 6 (0,71)            | 2 (0,63)                      | 0,88 (0,18–4,40)  | 1 (1,30)                        | 1,83 (0,22–15,39)   | 1 (0,42)                          | 0,58 (0,07–4,85)  |
| <b>30–39 aa</b>         | 5 (0,46)            | 8 (0,79)                      | 1,70 (0,55–5,21)  | 5 (1,67)                        | 3,65 (1,05–12,69)   | 3 (0,42)                          | 0,90 (0,21–3,77)  |
| <b>40–49 aa</b>         | 11 (0,82)           | 19 (1,19)                     | 1,45 (0,69–3,06)  | 13 (2,33)                       | 2,89 (1,29–6,49)    | 6 (0,58)                          | 0,70 (0,26–1,90)  |
| <b>50–59 aa</b>         | 10 (1,01)           | 49 (2,58)                     | 2,60 (1,31–5,16)  | 33 (5,02)                       | 5,20 (2,54–10,62)   | 16 (1,29)                         | 1,28 (0,58–2,84)  |
| <b>60–69 aa</b>         | 34 (3,43)           | 45 (3,55)                     | 1,04 (0,66–1,63)  | 25 (6,11)                       | 1,83 (1,08–3,11)    | 20 (2,33)                         | 0,67 (0,38–1,18)  |
| <b>Bianchi</b>          | 43 (0,98)           | 101 (1,87)                    | 1,92 (1,34–2,76)  | 62 (3,57)                       | 3,74 (2,52–5,54)    | 39 (1,06)                         | 1,09 (0,70–1,68)  |
| <b>Neri</b>             | 19 (3,12)           | 10 (2,65)                     | 0,84 (0,39–1,83)  | 6 (4,20)                        | 1,36 (0,53–3,47)    | 4 (1,70)                          | 0,54 (0,18–1,60)  |
| <b>Altre razze</b>      | 4 (1,61)            | 12 (3,70)                     | 2,36 (0,75–7,39)  | 9 (7,56)                        | 5,01 (1,51–16,62)   | 3 (1,46)                          | 0,91 (0,20–4,11)  |
| <b>Claudicatio</b>      |                     |                               |                   |                                 |                     |                                   |                   |
| <b>Totale</b>           | 48 (0,92)           | 157 (2,57)                    | 2,86 (2,06–3,96)  | 83 (4,15)                       | 4,69 (3,27–6,72)    | 74 (1,80)                         | 1,99 (1,38–2,87)  |
| <b>Maschi</b>           | 19 (0,77)           | 38 (3,16)                     | 4,20 (2,41–7,32)  | 17 (4,43)                       | 5,96 (3,07–11,58)   | 21 (2,57)                         | 3,39 (1,81–6,34)  |
| <b>Femmine</b>          | 29 (1,04)           | 119 (2,43)                    | 2,36 (1,57–3,55)  | 66 (4,09)                       | 4,04 (2,60–6,28)    | 53 (1,61)                         | 1,55 (0,99–2,45)  |
| <b>18–29 aa</b>         | 1 (0,12)            | 1 (0,32)                      | 0,66 (0,17–42,58) | 0 (0,00)                        | Non disponibile     | 1 (0,42)                          | 3,51 (0,22–56,33) |
| <b>30–39 aa</b>         | 2 (0,19)            | 11 (1,08)                     | 5,88 (1,30–26,58) | 4 (1,34)                        | 7,29 (1,33–40,02)   | 7 (0,97)                          | 5,29 (1,10–25,53) |
| <b>40–49 aa</b>         | 6 (0,45)            | 21 (1,31)                     | 2,96 (1,19–7,35)  | 14 (2,51)                       | 5,74 (2,19–15,01)   | 7 (0,67)                          | 1,50 (0,50–4,49)  |
| <b>50–59 aa</b>         | 10 (1,01)           | 64 (3,37)                     | 3,43 (1,75–6,70)  | 38 (5,78)                       | 6,03 (2,99–12,20)   | 26 (2,09)                         | 2,10 (1,01–4,38)  |
| <b>60–69 aa</b>         | 29 (2,93)           | 60 (4,74)                     | 1,65 (1,05–2,59)  | 27 (6,60)                       | 2,34 (1,37–4,01)    | 33 (3,85)                         | 1,33 (0,80–2,20)  |
| <b>Bianchi</b>          | 33 (0,75)           | 128 (2,37)                    | 3,20 (2,18–4,70)  | 67 (3,86)                       | 5,29 (3,47–8,06)    | 61 (1,67)                         | 2,23 (1,46–3,42)  |
| <b>Neri</b>             | 14 (2,30)           | 17 (4,50)                     | 2,00 (0,97–4,11)  | 9 (6,29)                        | 2,85 (1,21–6,73)    | 8 (3,40)                          | 1,50 (0,62–3,62)  |
| <b>Altre razze</b>      | 1 (0,40)            | 12 (3,70)                     | 9,54 (1,23–73,86) | 7 (5,88)                        | 15,50 (1,88–127,48) | 5 (2,44)                          | 6,20 (0,72–53,50) |

Abbreviazioni: IC = Intervallo di confidenza; OR = odds ratio.  
\*Tutti gli OR sono verso i controlli.

**Figura 1** Eemicrania ed eventi cardiovascolari

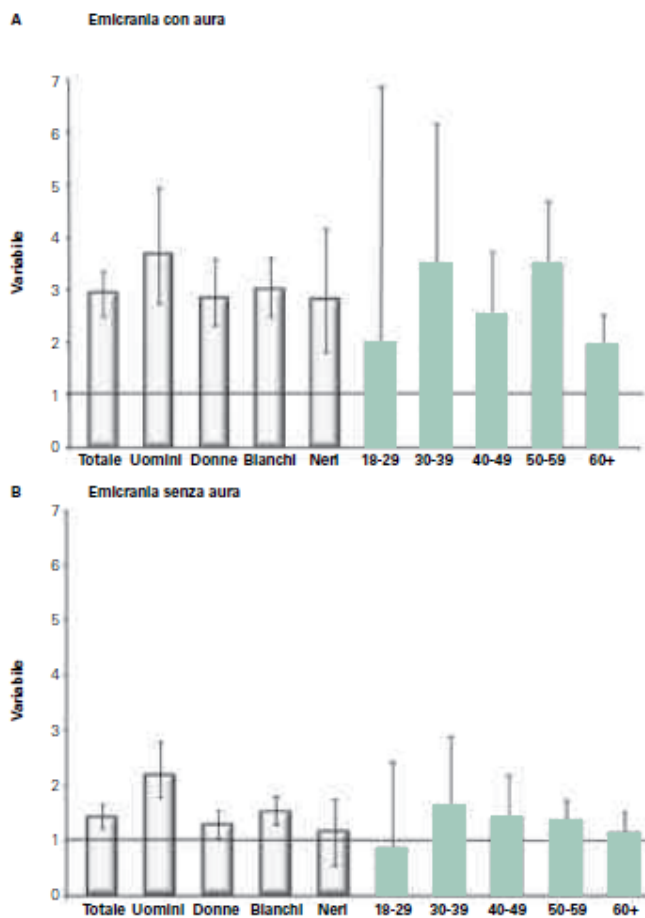

Odds ratio per la presenza di un qualsiasi evento cardiovascolare nei soggetti affetti da emicrania con aura (A) e senza aura (B). Gli istogrammi rappresentano gli odds ratio e le linee rappresentano gli intervalli di confidenza.

la MO (10,6, 5,4) rispetto ai controlli (8,5, 6,1) ( $p < 0,001$  per tutti i confronti con i controlli). I punteggi sono stati significativamente più elevati negli emicranici di ambo i sessi (in totale, nella MO e nella MA). I punteggi sono stati numericamente più elevati per tutte le fasce di età inferiore ai 70 anni. I punteggi sono stati significativamente più elevati nei soggetti emicranici per tutte le fasce di età comprese tra 30 e 59 anni.

**Analisi multivariate.** Poiché l'emicrania è stata associata sia alle CVD che ai fattori di rischio di CVD, e dato che alcuni farmaci impiegati per il trattamento dell'emicrania sono vasocostrittori, nei nostri modelli multivariati abbiamo testato gli effetti principali dopo aggiustamento per sesso, età, disabilità ed uso di triptani, così come per i fattori di rischio di CVD valutati nel nostro

studio (diabete, ipertensione, fumo ed ipercolesterolemia). L'emicrania in generale è rimasta significativamente associata all'infarto miocardico (OR 2,2, IC 95% 1,7-2,8), all'ictus (OR 1,5, IC 95% 1,2-2,1) e alla claudicazione (OR 2,69, IC 95% 1,98-3,23). La MA è risultata significativamente associata ai 3 outcome. La MO è rimasta associata all'infarto del miocardio e all'ictus, ma non alla claudicazione (Tabella 2).

**DISCUSSIONE** L'associazione tra l'emicrania e gli eventi cardiovascolari è stata esplorata in numerosi studi. Nel caso della TIA, dell'ictus ischemico e delle lesioni cerebrali subcliniche, l'associazione con la MA è stata dimostrata in studi caso-controllo e trasversali, è stata riassunta nelle meta-analisi (25-27) ed è stata dimostrata in grandi studi longitudinali (3,4,28).

A causa dell'associazione tra l'emicrania (principalmente la MA) e l'ictus ischemico, è importante capire se l'emicrania è, allo stesso modo, associata anche alla cardiopatia ischemica. Sebbene alcuni studi abbiano fornito risultati negativi (29), alcuni case reports (30) e studi di coorte (9) hanno riscontrato un'associazione tra l'emicrania e il dolore toracico, e le alterazioni elettrocardiografiche ischemiche (31). Tre recenti studi di popolazione hanno inoltre confermato la relazione tra la MA e la coronaropatia (3,7-9). Infine, è stato anche suggerito che nei pazienti affetti da emicrania siano alterati alcuni marker subclinici di malattia vascolare (10).

Alcuni dei nostri dati confermano i risultati di precedenti studi di popolazione, mentre altri forniscono ulteriori informazioni su questioni ampiamente controverse. Tra le conferme, abbiamo osservato che la MA è un fattore di rischio non solo per l'ictus, ma anche per l'attacco cardiaco e la claudicazione, così come per i fattori di rischio di CVD (specialmente diabete, ipertensione ed ipercolesterolemia). Il nostro studio suggerisce chiaramente che anche la MO è associata all'attacco cardiaco (ma non all'ictus), ed ai fattori di rischio per gli eventi cardiovascolari. Per quanto attiene agli eventi stabiliti, l'entità del rischio è risultata inferiore rispetto a MA, ma presente. Nel caso dei fattori di rischio per gli eventi cardiovascolari, la differenza tra MO e MA è stata inferiore. I soggetti con MO, al pari dei soggetti con MA, avevano un elevato rischio cardiovascolare, come stimato dal punteggio di Framingham modificato, in confronto ai controlli.

I meccanismi che legano l'emicrania alle malattie vascolari ischemiche sono ancora poco chiari e sono verosimilmente complessi; questo argomento è stato già trattato altrove (32). Per esempio, la depressione corticale propagata, il presunto substrato dell'aura, può predisporre direttamente alla comparsa di lesioni cerebrali, e questo potrebbe spiegare perché la MA si è costantemente dimostrata essere un fattore di rischio per l'ischemia cerebrale. Per quanto attiene gli attacchi cardiaci e la claudicazione, altri fat-

**Figura 2** Eemicrania e rischio cardiovascolare

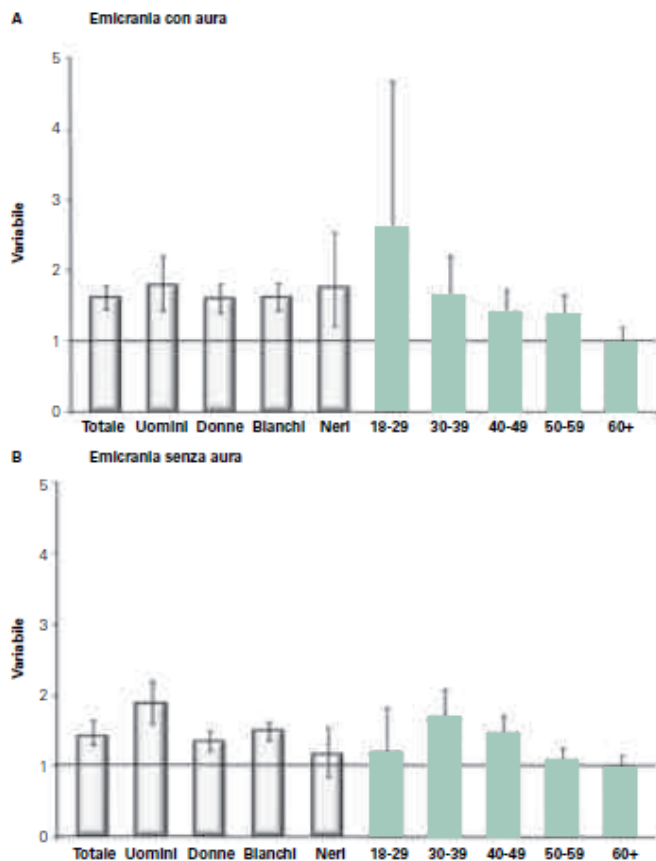

Odds ratio per la presenza di almeno 2 fattori di rischio per gli eventi cardiovascolari nei soggetti affetti da emicrania con aura (A) e senza aura (B). Gli istogrammi rappresentano gli odds ratio e le linee rappresentano gli intervalli di confidenza.

tori potrebbero giocare un ruolo (es., l'emicrania può essere associata ad aterosclerosi in generale (10), o essere in comorbidità con i fattori di rischio di CVD (11)). È fondamentale comprendere la natura causale della fisiopatologia di questa associazione. Per quanto la conoscenza dei meccanismi di questa associazione sia limitata, i nostri risultati, collocati nel contesto delle evidenze disponibili, suggeriscono che un cambiamento del paradigma concettuale dell'emicrania potrebbe essere importante. È stato suggerito che solo i pazienti con MA sono a rischio aumentato di CVD e, pertanto, la vasta maggioranza dei pazienti (specialmente quelli con MO) dovrebbe essere rassicurata (33). Concordiamo sul fatto che la maggioranza dei pazienti affetti da emicrania (con o senza aura) debba essere rassicurata. Tuttavia, il rischio esiste. Gli studi futuri dovranno essere indirizzati alla definizione dei soggetti emicranici a più alto rischio. Esempi includono

la valutazione dell'importanza della frequenza e della severità della cefalea, la frequenza delle aurore, l'importanza cumulativa dei molteplici fattori di rischio ed il rischio relativo dell'emicrania rispetto agli altri fattori di rischio. In secondo luogo, è importante valutare come il trattamento dell'emicrania modifichi il rischio. Per esempio, se la frequenza delle aurore e delle cefalee aumenta il rischio di CVD, la profilassi dell'emicrania dovrebbe essere associata ad una diminuzione del rischio. In alternativa, si dovrebbe valutare la rilevanza del trattamento acuto nel ridurre o aumentare il rischio, soprattutto se si considera che alcuni farmaci antiinfiammatori sono associati ad un aumento del rischio cardiovascolare (34), e che composti come l'ergotamina sono vasocostrittori (35). Inoltre, va accertata l'importanza dei farmaci cardioprotettivi nell'ambito del trattamento dell'emicrania (36). Infine, sulla base di questi risultati, i clinici dovrebbero vigilare maggiormente sulla presenza di eventuali fattori modificabili di rischio cardiovascolare, quali obesità, ipertensione, iperlipidemia e diabete, nei pazienti con emicrania. Inoltre, le componenti della sindrome metabolica sono in comorbidità con l'emicrania (37).

Il nostro studio presenta delle limitazioni. In primo luogo, le diagnosi di cefalea sono basate su questionari e non su valutazioni cliniche dirette. Sebbene i nostri questionari siano ben validati ed abbiano una notevole sensibilità e specificità (38), un certo grado di errore diagnostico è possibile. Tuttavia, è improbabile che questi errori possano spiegare questi risultati straordinariamente positivi. In secondo luogo, anche la valutazione degli eventi cardiovascolari e dei fattori di rischio si è basata su diagnosi mediche auto-riferite. Ancora una volta, questi metodi sono stati convalidati mediante validazione degli eventi e sono diffusamente accettati (3,22). Ciò nonostante, quale preparazione per future fasi del nostro studio, abbiamo condotto una validazione degli eventi cardiovascolari, per convalidare nuovamente il metodo. Anche se questa fase non si è conclusa, si suggerisce cautela. Inoltre, molti fattori che potrebbero aggiungersi al rischio di CVD non sono stati valutati, principalmente a causa di limitazioni nella durata dell'indagine con questionario. In particolare, l'influenza dell'uso di farmaci contraccettivi o della terapia di sostituzione ormonale non è stata modellata nei nostri risultati. Tuttavia, dato che i nostri risultati sono rimasti straordinariamente positivi negli uomini e, a meno che non vi sia stato un uso differenziale di farmaci contraccettivi o della terapia di sostituzione ormonale tra soggetti emicranici e controlli, il rischio di un possibile bias non dovrebbe essere elevato. Inoltre, alcuni dei confronti effettuati, in particolare quelli fra i sottogruppi, hanno coinvolto un piccolo numero di eventi e pertanto alcuni risultati di queste analisi di sottogruppo possono non essere affidabili. Ancora, date le grandi dimensioni del nostro

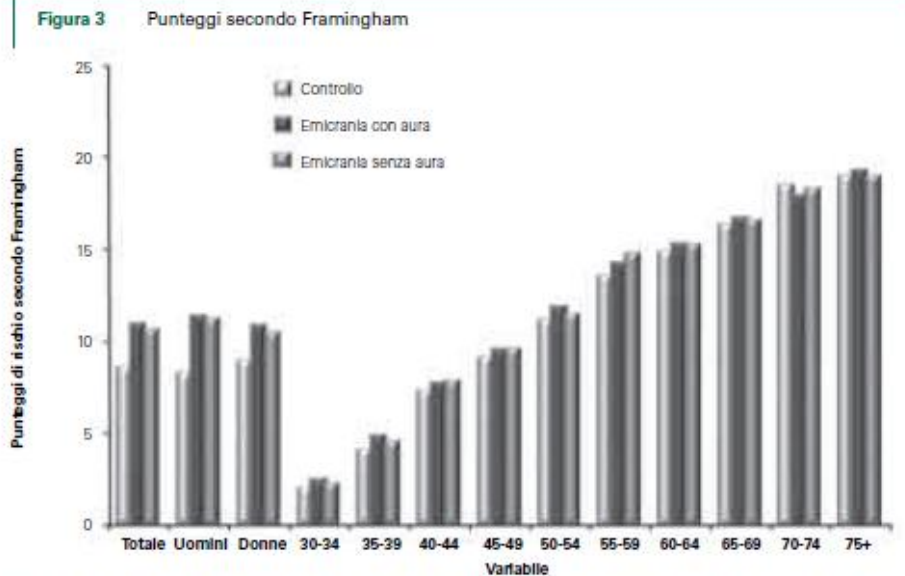

Punteggi di rischio secondo Framingham dei partecipanti in funzione dello stato di emicrania e delle caratteristiche demografiche. La stratificazione è per età in anni.

campione, alcune delle differenze statisticamente significative possono non essere clinicamente rilevanti. Infine, riconosciamo il limite che i soggetti con fattori di rischio di CVD possono ricorrere alle cure di un medico più spesso dei soggetti senza fattori di rischio, con conseguente aumento delle probabilità di ricevere una diagnosi di emicrania.

I punti di forza del nostro studio includono una valutazione minuziosa delle caratteristiche della cefalea, l'uso di strumenti ben validati, una buona caratterizzazione della coorte, la sicurezza sull'assenza di cefalea nei controlli (in quanto sono stati esaminati due volte: nel 2004 e di nuovo in questo studio) e la robustezza delle dimensioni del nostro campione.

Sia MA che MO sono associate alle CVD ed ai fattori di rischio per le CVD. Chi presta assistenza dovrebbe essere consapevole di questa associazione per identificare adeguatamente i soggetti a rischio particolarmente elevato, oltre a pianificare un trattamento rivolto non solo

all'emicrania, ma anche alle complicanze potenzialmente associate alla stessa emicrania.

#### DISCLOSURE

Dr. Bigal has served on scientific advisory boards for Merck & Co. Inc., GlaxoSmithKline, AstraZeneca, and OMP; serves as Co-editor of the Abstract Section of Headache; has served on speakers' bureaus for and received speaker honoraria from Merck & Co. Inc., Pfizer Inc., and OMP; is a full-time employee of and holds stock and stock options in Merck & Co. Inc.; and has received research support from the National Headache Foundation and the American Headache Society. Dr. Kurth has received funding for travel from the Restless Legs Syndrome Foundation; serves as a consultant to i3 Drug Safety and World Health Information Science Consultants, LLC; has received honoraria from Genzyme Corporation, Merck Serono, and Pfizer Inc. for educational lectures; and has received research support from McNeil Consumer & Specialty Pharmaceuticals, Merck Serono, Wyeth, the NIH [JHL091880-01 (PI) and NS061836-01 (PI)], the French National Research Agency, and the Migraine Research Foundation. Dr. Santanello serves as a reviewer for foundation grants and fellowship awards for PhRMA Foundation; is a full-time employee (Vice President of Epidemiology) of and holds stock and stock option in Merck & Co., Inc.; and in his position as Vice President of Epidemiology has acted as a witness in legal proceedings. Dr. Buse has served on a scientific advisory board for ENDO Pharmaceuticals. Dr. Golden is a full-time employee of and holds stock option in Merck & Co., Inc. Dr. Robbins received a Kirschstein National Service Research Award (training grant in geriatrics). Dr. Lipton serves/has served on scientific advisory boards for and received funding for travel from Bayer Schering Pharma, Merck Serono, GlaxoSmithKline, Endo Pharmaceuticals, Kowa Pharmaceuticals America, Inc., Allergan, Inc., Neuralie Inc., Ortho-McNeil-Janssen Pharmaceuticals, Inc.; has

**Tabella 2** Effetti principali dell'emicrania e dei sottotipi di emicrania sugli outcome di CVD dopo aggiustamento\*

| Outcome di CVD     | Emicrania vs controlli, OR (IC 95%) | MA vs controlli, OR (IC 95%) | MO vs controlli, OR (IC 95%) |
|--------------------|-------------------------------------|------------------------------|------------------------------|
| Infarto miocardico | 2,16 (1,70-2,76)                    | 2,86 (2,14-3,82)             | 1,85 (1,41-2,42)             |
| Ictus              | 1,54 (1,16-2,05)                    | 2,78 (2,02-3,84)             | 0,97 (0,69-1,36)             |
| Claudicatio        | 2,69 (1,99-3,23)                    | 4,61 (3,10-6,12)             | 3,11 (1,75-6,23)             |

Abbreviazioni: IC = Intervallo di confidenza; CVD = malattia cardiovascolare; MA = emicrania con aura; MO = emicrania senza aura; OR = odds ratio.

\*Vedi Metodi per gli aggiustamenti e per l'elenco delle covariate.

received funding for travel from the American Headache Society and the Diamond Headache Center; serves as Associate Editor of Cephalalgia and on the editorial boards of Neurology® and Headache; receives royalties from publishing Headache in Clinical Practice (Isis Medical Media, 2002), Headache in Primary Care (Isis Medical Media, 1999), Wolff's Headache (Oxford University Press, 2001, 2008), Managing Migraine: A Physician's Guide (BC Decker, 2008), and Managing Migraine: A Patient's Guide (BC Decker, 2008); has received speaker honoraria from the National Headache Foundation, the University of Oklahoma, the American Academy of Neurology, the Annenberg Foundation, Merck Serono, GlaxoSmithKline, and Coherex Medical; receives research support from the American Headache Society, National Headache Foundation, the Migraine Research Foundation, and the NIH [PO1AG03949 (Program Director, Project Leader), PO1AG027734 (Project Leader), RO1AG25119 (Co-I), K23AG030857 (Co-Mentor), K23NS05140901A1 (Co-Mentor), and K23NS47256 (Mentor)]; and holds stock options in Minster Pharmaceuticals plc.

*Ricevuto il 31 Maggio, 2009. Accettato in versione definitiva il 9 ottobre 2009.*

#### BIBLIOGRAFIA

- Elliott D. Migraine and stroke: current perspectives. *Neurol Res* 2008;30:801–812.
- Kruit MC, van Buchem MA, Hofman PA, et al. Migraine as a risk factor for subclinical brain lesions. *JAMA* 2004; 291:427–434.
- Kurth T, Slomke MA, Kase CS, et al. Migraine, headache, and the risk of stroke in women: a prospective study. *Neurology* 2005;64:1020–1026.
- MacClellan LR, Mitchell BD, Cole JW, et al. Familial aggregation of ischemic stroke in young women: the Stroke Prevention in Young Women Study. *Genet Epidemiol* 2006;30:602–608.
- Kruit MC, Launer LJ, Ferrari MD, van Buchem MA. Brain stem and cerebellar hyperintense lesions in migraine. *Stroke* 2006;37:1109–1112.
- Kurth T, Diener HC. Current views of the risk of stroke for migraine with and migraine without aura. *Curr Pain Headache Rep* 2006;10:214–220.
- Kurth T, Gaziano JM, Cook NR, Logroscino G, Diener HC, Buring JE. Migraine and risk of cardiovascular disease in women. *JAMA* 2006;296:283–291.
- Kurth T, Gaziano JM, Cook NR, et al. Migraine and risk of cardiovascular disease in men. *Arch Intern Med* 2007; 167:795–801.
- Rose KM, Carson AP, Sanford CP, et al. Migraine and other headaches: associations with Rose angina and coronary heart disease. *Neurology* 2004;63:2233–2239.
- Rose KM, Wong TY, Carson AP, Couper DJ, Klein R, Sharrett AR. Migraine and retinal microvascular abnormalities: the Atherosclerosis Risk in Communities Study. *Neurology* 2007;68:1694–1700.
- Scher AI, Terwindt GM, Picavet HS, Verschuren WM, Ferrari MD, Launer LJ. Cardiovascular risk factors and migraine: the GEM population-based study. *Neurology* 2005;64:614–620.
- Scher AI, Terwindt GM, Verschuren WM, et al. Migraine and MTHFR C677T genotype in a population-based sample. *Ann Neurol* 2006;59:372–375.
- Schürks M, Zee RY, Buring JE, Kurth T. Polymorphisms in the renin-angiotensin system and migraine in women. *Headache* 2009;49:292–299.
- Schürks M, Zee RY, Buring JE, Kurth T. Interrelationships among the MTHFR 677CT polymorphism, migraine, and cardiovascular disease. *Neurology* 2008;71: 505–513.
- Lipton RB, Bigal ME, Diamond M, Freitag F, Reed ML, Stewart WF. Migraine prevalence, disease burden, and the need for preventive therapy. *Neurology* 2007;68:343–349.
- Stewart WF, Bigal ME, Lipton RB. Lifetime migraine incidence: results from the American Migraine Prevalence and Prevention study. *Headache* 2005;46:52.
- Diamond S, Bigal ME, Silberstein S, Loder E, Reed M, Lipton RB. Patterns of diagnosis and acute and preventive treatment for migraine in the United States: results from the American Migraine Prevalence and Prevention study. *Headache* 2007;47:355–363.
- Bigal ME, Lipton RB. Excessive acute migraine medication use and migraine progression. *Neurology* 2008;71: 1821–1828.
- Lipton RB, Stewart WF, Diamond S, Diamond ML, Reed M. Prevalence and burden of migraine in the United States: data from the American Migraine Study II. *Headache* 2001;41:646–657.
- The International Classification of Headache Disorders, 2nd edition. *Cephalalgia* 2004;24(suppl 1):1–149.
- Bigal ME, Serrano D, Reed M, Lipton RB. Chronic migraine in the population: burden, diagnosis, and satisfaction with treatment. *Neurology* 2008;71:559–566.
- D'Agostino RB Sr, Vasan RS, Pencina MJ, et al. General cardiovascular risk profile for use in primary care: the Framingham Heart Study. *Circulation* 2008;117:743–753.
- Lloyd-Jones DM, Wilson PW, Larson MG, et al. Framingham risk score and prediction of lifetime risk for coronary heart disease. *Am J Cardiol* 2004;94:20–24.
- Gramling R, Klein W, Roberts M, Waring ME, Gramling D, Eaton CB. Self-rated cardiovascular risk and 15-year cardiovascular mortality. *Ann Fam Med* 2008;6:302–306.
- Etminan M, Takkouche B, Isorna FC, Samii A. Risk of ischemic stroke in people with migraine: systematic review and meta-analysis of observational studies. *BMJ* 2005;330:63.
- Buring JE, Hebert P, Romero J, et al. Migraine and subsequent risk of stroke in the Physicians' Health Study. *Arch Neurol* 1995;52:129–134.
- Diener HC, Kurth T. Is migraine a risk factor for stroke? *Neurology* 2005;64:1496–1497.
- Porter A, Gladstone JP, Dodick DW. Migraine and white matter hyperintensities. *Curr Pain Headache Rep* 2005;9: 289–293.
- Rosamond W. Are migraine and coronary heart disease associated? An epidemiologic review. *Headache* 2004;44 suppl 1:S5–S12.
- Wayne VS. A possible relationship between migraine and coronary artery spasm. *Aust NZ J Med* 1986;16:708–710.
- Uyarel H, Erden I, Cam N. Acute migraine attack, anginal-like chest pain with documented ST-segment elevation and slow coronary flow. *Acta Cardiol* 2005;60:221–223.
- Bigal ME, Kurth T, Hu H, Santanello N, Lipton RB. Migraine and cardiovascular disease: possible mechanisms of interaction. *Neurology* 2009;72:1864–1871.
- Bigal M, Kurth T, Hu H, Santanello N, Lipton R. Migraine and cardiovascular disease: possible mechanisms of interaction. *Neurology* 2009;72:1864–1871.
- Chan AT, Manson JE, Albert CM, et al. Nonsteroidal antiinflammatory drugs, acetaminophen, and the risk of cardiovascular events. *Circulation* 2006;113:1578–1587.
- Hargreaves RJ. Pharmacology and potential mechanisms of action of rizatriptan. *Cephalalgia* 2000;20 suppl 1:2–9.
- Bigal ME, Sheftell FD, Tepper SJ, Rapoport AM. Migraine and silent infarcts. Are we making the proper decisions? *Cephalalgia* 2006;26:629–630.
- Cavestro C, Rosatello A, Micca G, et al. Insulin metabolism is altered in migraineurs: a new pathogenic mechanism for migraine? *Headache* 2007;47:1436–1442.
- Lipton RB, Stewart WF, Simon D. Medical consultation for migraine: results from the American Migraine Study. *Headache* 1998;38:87–96.
