# Supplementary material
Source: PubMed Central journal article supplement (PMC3462501)
Supplement: supp_WNL.0b013e3181d0cc8b_Bigal_74-628.pdf [file supp_WNL.0b013e3181d0cc8b_Bigal_74-628.pdf]

## 편두통과 심혈관 질환

인구 기반 연구

Migraine and cardiovascular disease

A population-based study

M.E. Bigal, MD, PhD  
T. Kurth, MD, PhD  
N. Santanello, MD  
D. Buse, PhD  
W. Golden, MSc  
M. Robbins, MD  
R.R. Lipton, MD

**목적** : 편두통과 심혈관 질환(cardiovascular disease, CVD)의 관계에 대하여 연구되어 왔으나 많은 의문점들이 해결되지 않은 채 남아있다. 저자들은 전구증상을 동반한(migraine with aura, MA), 또는 동반하지 않는(migraine without aura, MO) 편두통 환자들을 대상으로, CVD로 진단받은 빈도와 위험인자의 빈도를 대조군과 비교하였다.

**방법** : 환자대조군 연구로 진행하였으며, 편두통 환자 6,102명과 대조군 5,243명을 미국의 성인 인구 집단 대표로 선정하였다. 두통은 검증된 설문지를 우편으로 보내 진단하였으며, 치료, 동반 질환 및 기타 변수들에 대한 자세한 정보를 우편 발송을 통하여 얻었다. CVD 발생 유무는 자가 보고 진단(self-reported medical diagnosis)에 근거하였고, CVD의 위험인자와 수정 Framingham 점수를 기록하였다.

**결과** : 미조정 분석(unadjusted analysis)에 따르면, 편두통 전체와 MA는 심근경색, 뇌졸중 및 하지 허혈성 증상(claudication)과 연관이 있으며, MO는 심근경색 및 하지 허혈성 증상과 연관이 있었다. 편두통 환자들은 대조군에 비하여 당뇨(12.6% vs. 9.4%, 교차비[odds ratio, OR] 1.4, 95% 신뢰구간[CI] 1.2~1.6), 고혈압(33.1% vs. 27.5%, OR 1.4, 95% CI 1.3~1.6), 고 콜레스테롤 혈중(32.7% vs. 25.6%, OR 1.4, 95% CI 1.3~1.5)이 더 많은 것으로 나타났다. 위험인자의 빈도는 MA 환자들에서 가장 높았으나 MO 환자들에서도 높았다. Framingham 점수는 대조군과 비교하였을 때 MO, MA 환자에서 현저히 더 높았다. 성별, 나이, 장애 정도, 치료 상태, CVD의 위험인자를 보정하고 분석하여도 편두통 환자에서 심근경색(OR 2.2, 95% CI 1.7~2.8), 뇌졸중(OR 1.5, 95% CI 1.2~2.1), 하지 허혈성 증상(OR 2.69, 95% CI 1.98~3.23)의 위험도가 여전히 연관이 있었다.

**결론** : MA, MO는 CVD와 관련이 있으며, 위험인자와도 연관이 있다. 그러나 본 연구의 표본 수가 커서 임상적 타당성 여부는 향후 입증되어야 할 것이다.

Neurology® 2010;74:628-635

허혈성 뇌졸중과 무증상 뇌 병변을 포함하는 심혈관 질환(cardiovascular disease, CVD)과 편두통의 관계는 최소 migraine with aura (MA)에서는 잘 입증되어 있다.<sup>1,6</sup> MA는 또한 허혈성심질환(ischemic heart disease), 하지 허혈성 증상, 심혈관 사망률과도 관련이 있다.<sup>7,9</sup> 따라서 편두통이 동맥경화성 질환(atherosclerotic diseases)의 위험인자일 것이라고 추측하고 있다.<sup>10</sup>

편두통과 CVD의 연관성에 대한 많은 생물학적 가설 중, MA가 CVD의 위험인자를 더 많이 가지고 있을 뿐만 아니라,<sup>11</sup> CVD와 관계된 특정 유전자형을 가지고 있을 것이라는 가설이 제시되어 왔다.<sup>12-14</sup> 그럼에도 불구하고 많은 의문점들이 미해결 상태로 남아있다. 우선, MA와 MO가 모두 CVD의 위험인자인지, 혹은 MA만 연관이 있는지 불확실하다. 둘째로, 대부분의 연구에서 편두통을 자가 보고 진단에 근거하여 평가하였다(이 방법은 입증된 방법이기도 하다).<sup>3,7</sup>

미국 편두통 유행과 예방(American Migraine Prevalence and Prevention, AMPP) 연구의 일부로, 미국 인구 집단의 대표로 선발된 12만 가정을 5년간 추적 관찰하였다.<sup>15-17</sup> 따라서 AMPP 코호트에서 두통의 특성을 정확하게 파악할 수 있었으며, 연구 참여자들을 대상으로 여성 건강 연구(Women's Health Study)<sup>7</sup>에 사용되었던 입증된 CVD 도구를 이용하여 다시 한 번 조사할 수 있었다. 1) 편두통 환자와 대조군에서 CVD의 위험인자를 조사하고, 2) CVD 발생 유무를 확실히 하며, 3) 다양한 연령대에서 남성과 여성 모두에서 MA 및 MO, CVD의 관계에 대하여 평가하였다.

## 방 법

### 1. 연구 집단

AMPP는 일반 인구 집단에서 대표 표본을 선출, 두통으로 고생하는 환자들에 대하여 추적한 연구

(longitudinal study)이다. AMPP는 2단계의 주요 임상시험으로 구성되어 있으며, 1단계에서는 두통으로 심하게 고통받는 환자들의 대표 표본을 확인하기 위하여 입증된 자가 관리식 선별 설문지(self-administered screening questionnaire)를 사용하였다.<sup>16</sup> 60만의 국가 가정 명부에서 12만의 가정을 계층화 표본으로 선출하여 2004년에 선별 설문지를 우편 발송하였다.

두 번째 단계에서는 5년간의 추적 관찰 기간 동안 무작위로 24,000명의 두통 환자를 선별하였고 편두통의 발생 빈도(incidence)와 예측, 병의 진행과 관련된 위험인자를 조사하였다.<sup>18</sup>

대조군은 2004년에 선출한 이후로 다시 조사하지 않았기 때문에, 저자들은 2004년 당시에 두통이 없다고 한 1만명의 표본에 대하여 다시 조사를 실시하고, 그 중 두통이 없는 상태로 지속된 사람들을 대조군에 포함시켰다.

## 2. 조사의 기술

설문지는 82개의 항목으로 구성되어 있으며 두통의 진단, 동반 질환, 두통으로 인한 영향, 건강과 관련한 삶의 질, 인구통계학적인 항목, 기타 관심 항목들을 평가하였다. 두통 관련 항목은 3가지의 두통 타입에 대하여 각각 21개의 질문으로 구성되어 있는데, 이는 이미 기존의 연구에서 입증되어 있으며, AMPP에서 매년 사용되고 있다.<sup>19</sup>

MA와 MO는 다른 두통과 마찬가지로 국제 두통 분류(International Classification of Headache) 2판<sup>20</sup>에 근거하여 진단하였다. 편두통 진단은 100%의 민감도와 82.3%의 특이도를 보였다.<sup>19</sup> 조사의 일부로, 장애 정도(disability), 동반 질환, 편두통의 급성, 예방 치료에 대하여서도 여러 질문에 걸쳐 조사하였다.<sup>21</sup>

대조군 또한 위의 방법과 동일한 두통 조사(21개 항목)를 실시하고, 인구통계학적인 항목, 심혈관 프로필에 대하여 평가하였다(아래 참고). 대조군은 편두통, 개인적 편두통(probable migraine) 또는 chronic daily headache의 과거력이 전혀 없는(삼화성 긴장 두통[episodic tension type headache, ETTH]의 과거력이 있으나 지난 한 해 두통이 없었던 경우 인정) 사람들로 구성되었다.

## 3. 심혈관 질환 발생의 평가

저자들은 자가 보고하는 CVD의 발생(심근경색, 뇌졸중, 일과성 허혈발작[transient ischemic attack],

관상동맥 재개술[coronary revascularization], 하지 허혈성 증상)에 대하여 기록하였으며, 이러한 질환들을 의학적으로 진단받았는지에 대하여서도 기록하였다. 각각의 CVD 발생에 대하여 발생 시기를 기록하였다. 의학 기록 검토를 통한 CVD 발생 보정에 있어, 같은 언어를 사용하고 같이 출간된 방법인 여성 건강 연구(Women's Health Study)<sup>7</sup>와 내과 건강 연구(Physicians' Health Study)<sup>8</sup> 방법을 따랐다.

## 4. 심혈관 질환 프로필 평가

CVD의 유무 뿐만 아니라 위험인자(즉, 흡연, 체질량지수, 고혈압)에 대한 정보도 수집하였다. 수정 Framingham 위험 점수를 이용하여 CVD 프로필을 평가하였다.<sup>22</sup> 이 점수는 자가 보고 혈압, 콜레스테롤치, 당뇨, 흡연 여부에 근거하여 계산하였으며, 지질 수치와 같은 검사치를 이용하여 계산하지 않았다. 타당화 연구(validation study)에서 살펴보면, 이 점수는 판별력(C statistics, 남성 0.763, 여성 0.793)과 보정력(calibration)을 보여준다. 특이도(specificity)는 84%이며, Framingham 위험 평가와 잘 일치한다. Framingham 위험 점수는 미국의 인구 집단 내에서 첫 번째 관상동맥 질환 발생의 절대적 위험을 예측하는 데 있어 보정이 잘 되어 있다.<sup>23</sup> 다른 연구들에서도 CVD의 위험 점수를 스스로 측정하는 이 방법이 CVD로 인한 사망을 예측한다고 보고하였다.<sup>24</sup>

## 5. 분석

CVD의 위험, 위험인자의 유무, Framingham 위험 점수에 대하여 대조군과 두통군의 비교를 실시하였다. Framingham 위험 점수를 제외한 나머지 항목들은 로지스틱 모형을 적용하였다. 모든 항목에서 대조군의 결과를 참고치로 삼았으며, 두통군과 위험도나 평균에서 차이를 보일 때, 교차비(odds ratio, OR)와 평균 차이(mean difference)로 표시하였다. 이러한 탐색적 분석을 통하여 성별, 나이, 인종, 체질량지수를 계층화하였다. 뿐만 아니라 두통으로 인한 장애도를 MIDAS 질문지로 측정하고, 트립탄(triptan)계 약물 사용 또한 계층화하여 표시하였다. 위험인자의 소분류(뇌경색과 뇌졸중)에 대해서는, 공변량(covariate)을 보정하여 주 효과 모델(main effect model)에 의한 계층화 분석을 확대하였다. 공변량은 CVD의 위험인자들(당뇨, 고혈압, 흡연, 고 콜레스테롤 혈중)과 체질량지수, 성별, 나이로 포함하였다. 모든 분석은 SAS 시스템을 이용

하였다.

6. 표준화된 프로토콜의 승인, 등록 및 환자의 동의  
AMPP 연구와 모든 서식들은 Albert Einstein 대학의 임상시험 심사위원회(Albert Einstein College of Medicine Investigation Review Board)에서 인증 받았으며, 임상시험 심사위원회(institutional review board)에서 매년 재인증을 받았다. 참가자들은 연구 참가에 동의를 한 대표위원단 중에서 지원자로 구성되었다.

## 결 과

편두통군 9,107명과 대조군 1만명을 대상으로 조사를 시작하여, 총 6,102명의 편두통 환자들(67%)과 5,243명의 대조군(52.4%의 응답률)이 모든 항목에 응답하였다. 응답자와 비응답자는 인구통계학적 항목의 뚜렷한 차이를 보이지 않았다. 인구통계학적 항목은 [www.neurology.org](http://www.neurology.org)에 Table e-1으로 정리되어 있다. 대조군과 비교하면, 편두통군은 여성이 더 많았으며(80.3% vs. 53%,  $p < 0.0001$ ), 수입이 적었다( $p < 0.001$ ). 대조군 연령대가 더 낮았다(평균 나이=20.4 vs. 24.0세,  $p < 0.01$ ).

### 1. 심혈관 질환 발생: 일변량 연관성(univariate associations)

Table 1에서 편두통군과 대조군의 심혈관 발생 빈도는 의학적으로 진단받았던 경우로 표시하였다. 전체 편두통군과 MA군에서 심장발작(heart attack), 뇌졸중, 하지 허혈성 증상의 빈도가 더 높았다. MO 환자에서는 심장발작, 하지 허혈성 증상의 빈도는 높았으나 뇌졸중의 빈도는 높지 않았다. MA 환자가 MO 환자보다 빈도가 더 높았다.

심근경색의 경우, 전체 편두통 환자는 39세 이상에서 대조군과 비교하였을 때 빈도가 현저히 증가하였다. 심근경색은 대조군의 1.9%에서 발생한 반면, 편두통군에서는 4.1%에서 발생하였다(OR 2.2, 95% CI 1.7-2.7). 30-39세(OR 3.5)와 40-49세(OR 4.2) 사이에서는 교차비(OR)가 더 높았지만, 그 이후로는 감소하였다(지속적으로 높은 상태를 유지하였으나). 발생 빈도는 남성(OR 3.3, 95% CI 2.4-4.6)과 여성(OR 2.3, 95% CI 1.6-3.3)에서 현저히 높았으며, 흑인에서는 유의하지는 않지만 빈도가 높았다. 교차비는 대조군에 비하여 MA 환자에서 훨씬 더 증가하였는데, 남성=3.7(2.4-5.7), 여성

=3.5(2.4-5.2)였다. 발생 위험은 30-39세에 가장 높았으며(OR 8.6, 95% CI 2.2-33.4), 40-49세에서도 높았다(OR 4.1, 95% CI 1.5-11.2). 발생 위험은 MO 환자 또한 대조군과 비교하였을 때 높았는데, 전체(OR 1.8, 95% CI 1.4-2.3), 남성(OR 3.1, 95% CI 2.1-4.4), 여성(OR 1.7, 95% CI 1.2-2.6)이었다. 여성과 40-49세(OR 4.4, 95% CI 1.7-10.9)에서 가장 높은 발생 빈도를 보였다.

뇌졸중은 대조군의 1.2%, 편두통 환자의 2.1%에서 발생하였는데(OR 1.61, 95% CI 1.2-2.2), 발생 빈도는 MA 환자에서 3.9%(OR 3.1, 95% CI 2.2-4.4), MO 환자에서는 1.12%(OR 0.9, 95% CI 0.6-1.3)를 보였다. MA 환자에서는 모든 성별과 30세 이상의 환자들에서는 모두 발생 빈도가 높았다. MO 환자에서는 성별이나 연령대에 따라 발생 위험의 뚜렷한 차이가 없었다. 그러나 발생 빈도의 수가 너무 적어서 소그룹의 일부에서는 이러한 비교 자체가 어려웠다.

마지막으로 하지 허혈성 증상의 경우, 전체 편두통 환자에서 발생 위험이 증가하였고(2.57% vs. 0.9%, OR 2.9, 95% CI 2.1-3.9), 편두통의 두 타입의 환자군 모두에서도 위험이 증가하였다. MA 환자에서 발생 위험은 남성, 여성 모두와 인종, 30세 이상의 환자들에서 현저히 증가하였다. MO에서는 남성과 백인에서 발생 위험이 뚜렷히 증가하였고, 다른 항목에서도 발생 위험이 증가하는 경향을 보였다(Table 1).

Figure 1은 MA, MO 환자를 대조군과 비교하여 발생 가능한 CVD의 발생 빈도를 교차비로 표시한 것이다. 그림에서 보는 것과 같이, 연관성은 MA에서 더 높게 나타났으나, 다른 항목에서와는 달리 남성과 백인 항목에서는 MO에서도 CVD 발생의 교차비가 의미있게 높은 것을 볼 수 있다.

### 2. 심혈관 질환의 위험인자

Table e-2는 인구통계학적인 항목으로 계층화하여, 편두통의 정도와 이미 알고 있는 CVD의 위험인자와 대조한 것이다. 전반적으로 편두통 환자들은 대조군에 비하여 당뇨(12.6% vs. 9.4%, OR 1.4, 95% CI 1.2-1.6), 고혈압(33.1% vs. 27.5%, OR 1.4, 95% CI 1.3-1.6), 고 콜레스테롤 혈증(32.7% vs. 25.6%, OR 1.4, 95% CI 1.3-1.5)의 빈도가 높았다.

MA 환자는 모든 위험인자와 뚜렷한 연관관계를 보였고, MO 환자는 당뇨, 고혈압, 고 콜레스테롤 혈증과 뚜렷한 연관이 있으나, 흡연과는 연관을

|                     | Control, n (%) | Migraine overall, n (%) | OR* (95% CI)      | Migraine with aura, n (%) | OR* (95% CI)        | Migraine without aura, n (%) | OR* (95% CI)      |
|---------------------|----------------|-------------------------|-------------------|---------------------------|---------------------|------------------------------|-------------------|
| <b>Heart attack</b> |                |                         |                   |                           |                     |                              |                   |
| Overall             | 100 (1.91)     | 249 (4.08)              | 2.19 (1.73-2.77)  | 110 (5.50)                | 2.99 (2.27-3.95)    | 139 (3.39)                   | 1.80 (1.39-2.34)  |
| Male                | 61 (2.47)      | 92 (7.65)               | 3.27 (2.35-4.55)  | 33 (8.59)                 | 3.71 (2.39-5.74)    | 59 (7.21)                    | 3.06 (2.12-4.42)  |
| Female              | 39 (1.40)      | 157 (3.20)              | 2.32 (1.63-3.31)  | 77 (4.77)                 | 3.52 (2.38-5.19)    | 80 (2.44)                    | 1.75 (1.19-2.58)  |
| 18-29 y             | 3 (0.36)       | 1 (0.32)                | 0.88 (0.09-8.52)  | 1 (1.30)                  | 3.67 (0.38-35.73)   | 0 (0.00)                     | Not available     |
| 30-39 y             | 3 (0.28)       | 10 (0.98)               | 3.55 (0.98-12.95) | 7 (2.34)                  | 8.59 (2.21-33.42)   | 3 (0.42)                     | 1.50 (0.30-7.46)  |
| 40-49 y             | 6 (0.45)       | 30 (1.88)               | 4.25 (1.76-10.25) | 10 (1.80)                 | 4.07 (1.47-11.25)   | 20 (1.92)                    | 4.35 (1.74-10.87) |
| 50-59 y             | 24 (2.42)      | 96 (5.05)               | 2.15 (1.36-3.38)  | 51 (7.76)                 | 3.40 (2.07-5.58)    | 45 (3.62)                    | 1.52 (0.92-2.51)  |
| 60-69 y             | 64 (6.46)      | 112 (8.84)              | 1.40 (1.02-1.93)  | 41 (10.02)                | 1.61 (1.07-2.43)    | 71 (8.28)                    | 1.31 (0.92-1.86)  |
| White               | 85 (1.94)      | 214 (3.96)              | 2.09 (1.62-2.69)  | 88 (5.07)                 | 2.70 (1.99-3.66)    | 126 (3.44)                   | 1.80 (1.36-2.38)  |
| Black               | 12 (1.97)      | 13 (3.44)               | 1.77 (0.80-3.93)  | 7 (4.90)                  | 2.56 (0.99-6.62)    | 6 (2.55)                     | 1.30 (0.48-3.51)  |
| Other race          | 3 (1.20)       | 22 (6.79)               | 5.97 (1.77-20.19) | 15 (12.61)                | 11.83 (3.35-41.72)  | 7 (3.41)                     | 2.90 (0.74-11.36) |
| <b>Stroke</b>       |                |                         |                   |                           |                     |                              |                   |
| Overall             | 66 (1.26)      | 123 (2.02)              | 1.61 (1.19-2.18)  | 77 (3.85)                 | 3.14 (2.25-4.38)    | 46 (1.12)                    | 0.89 (0.61-1.30)  |
| Male                | 27 (1.10)      | 25 (2.08)               | 1.92 (1.11-3.32)  | 16 (4.17)                 | 3.93 (2.10-7.36)    | 9 (1.10)                     | 1.00 (0.47-2.14)  |
| Female              | 39 (1.40)      | 98 (2.00)               | 1.43 (0.99-2.08)  | 61 (3.78)                 | 2.76 (1.84-4.14)    | 37 (1.13)                    | 0.80 (0.51-1.26)  |
| 18-29 y             | 6 (0.71)       | 2 (0.63)                | 0.88 (0.18-4.40)  | 1 (1.30)                  | 1.83 (0.22-15.39)   | 1 (0.42)                     | 0.58 (0.07-4.85)  |
| 30-39 y             | 5 (0.46)       | 8 (0.79)                | 1.70 (0.55-5.21)  | 5 (1.67)                  | 3.65 (1.05-12.69)   | 3 (0.42)                     | 0.90 (0.21-3.77)  |
| 40-49 y             | 11 (0.82)      | 19 (1.19)               | 1.45 (0.69-3.06)  | 13 (2.33)                 | 2.89 (1.29-6.49)    | 6 (0.58)                     | 0.70 (0.26-1.90)  |
| 50-59 y             | 10 (1.01)      | 49 (2.58)               | 2.60 (1.31-5.16)  | 33 (5.02)                 | 5.20 (2.54-10.62)   | 16 (1.29)                    | 1.28 (0.58-2.84)  |
| 60-69 y             | 34 (3.43)      | 45 (3.55)               | 1.04 (0.66-1.63)  | 25 (6.11)                 | 1.83 (1.08-3.11)    | 20 (2.33)                    | 0.67 (0.38-1.18)  |
| White               | 43 (0.98)      | 101 (1.87)              | 1.92 (1.34-2.76)  | 62 (3.57)                 | 3.74 (2.52-5.54)    | 39 (1.06)                    | 1.09 (0.70-1.68)  |
| Black               | 19 (3.12)      | 10 (2.65)               | 0.84 (0.39-1.83)  | 6 (4.20)                  | 1.36 (0.53-3.47)    | 4 (1.70)                     | 0.54 (0.18-1.60)  |
| Other race          | 4 (1.61)       | 12 (3.70)               | 2.36 (0.75-7.39)  | 9 (7.56)                  | 5.01 (1.51-16.62)   | 3 (1.46)                     | 0.91 (0.20-4.11)  |
| <b>Claudication</b> |                |                         |                   |                           |                     |                              |                   |
| Overall             | 48 (0.92)      | 157 (2.57)              | 2.86 (2.06-3.96)  | 83 (4.15)                 | 4.69 (3.27-6.72)    | 74 (1.80)                    | 1.99 (1.38-2.87)  |
| Male                | 19 (0.77)      | 38 (3.16)               | 4.20 (2.41-7.32)  | 17 (4.43)                 | 5.96 (3.07-11.58)   | 21 (2.57)                    | 3.39 (1.81-6.34)  |
| Female              | 29 (1.04)      | 119 (2.43)              | 2.36 (1.57-3.55)  | 66 (4.09)                 | 4.04 (2.60-6.28)    | 53 (1.61)                    | 1.55 (0.99-2.45)  |
| 18-29 y             | 1 (0.12)       | 1 (0.32)                | 0.66 (0.17-42.58) | 0 (0.00)                  | Not available       | 1 (0.42)                     | 3.51 (0.22-56.33) |
| 30-39 y             | 2 (0.19)       | 11 (1.08)               | 5.88 (1.30-26.58) | 4 (1.34)                  | 7.29 (1.33-40.02)   | 7 (0.97)                     | 5.29 (1.10-25.53) |
| 40-49 y             | 6 (0.45)       | 21 (1.31)               | 2.96 (1.19-7.35)  | 14 (2.51)                 | 5.74 (2.19-15.01)   | 7 (0.67)                     | 1.50 (0.50-4.49)  |
| 50-59 y             | 10 (1.01)      | 64 (3.37)               | 3.43 (1.75-6.70)  | 38 (5.78)                 | 6.03 (2.99-12.20)   | 26 (2.09)                    | 2.10 (1.01-4.38)  |
| 60-69 y             | 29 (2.93)      | 60 (4.74)               | 1.65 (1.05-2.59)  | 27 (6.60)                 | 2.34 (1.37-4.01)    | 33 (3.85)                    | 1.33 (0.80-2.20)  |
| White               | 33 (0.75)      | 128 (2.37)              | 3.20 (2.18-4.70)  | 67 (3.86)                 | 5.29 (3.47-8.06)    | 61 (1.67)                    | 2.23 (1.46-3.42)  |
| Black               | 14 (2.30)      | 17 (4.50)               | 2.00 (0.97-4.11)  | 9 (6.29)                  | 2.85 (1.21-6.73)    | 8 (3.40)                     | 1.50 (0.62-3.62)  |
| Other race          | 1 (0.40)       | 12 (3.70)               | 9.54 (1.23-73.88) | 7 (5.88)                  | 15.50 (1.98-127.48) | 5 (2.44)                     | 6.20 (0.72-53.50) |

Abbreviations: CI = confidence interval; OR = odds ratio.  
\* All ORs are vs control.

보이지 않았다. 연관 정도는 MO보다 MA에서 더 높게 나타났으며(Table e-2), 차이의 정도는 Table 1에서 본 CVD의 차이만큼 크지는 않았다.

Figure 2는 MA, MO 환자가 대조군과 비교하여, 4개의 연관된 위험인자들 중 최소 2개의 위험인자를 가지고 있을 위험도를 보여준다. 두 환자군에서 대부분의 인구통계학적 범주 내에서 하나 이상의 CVD 위험인자를 가지고 있었다.

### 3. 심혈관 질환 위험 평가: Framingham 점수

Table 3는 전체 편두통, MA, MO 환자들의 성별, 나이와 Framingham 점수를 보여준다. Framingham 점수를 살펴보면 전반적으로 전체 편두통 환자(평균 10.7, 표준편차[SD] 5.4), MA(11.0, 5.4), MO(10.6, 5.4)가 대조군(8.5, 6.1)에 비하여 현저히 높았다(대조군과의 비교에서 모두  $p < 0.001$ ). 편두통 환자(전체, MA, MO)의 점수는 두 성별 모두 높았고, 70세

이하에서도 점수가 높았다. Framingham 점수는 30-59세 연령군의 편두통 환자에서 특히 더 높았다.

#### 4. 다변량분석

편두통은 CVD 뿐만 아니라 CVD의 위험인자와도 연관이 있고, 편두통 치료 약물의 일부는 혈관 수축 작용을 하기 때문에, 저자들은 다변량 모형을 통하여 성별, 나이, 장애도, 트립탄 사용과 본 연구에서 평가한 CVD의 위험인자들(당뇨, 고혈압, 흡연, 고 콜레스테롤 혈증)을 보정한 후에 주요 영향을 평가하였다. 전체 편두통 환자는 심근경색(OR 2.2, 95% CI 1.7-2.8), 뇌졸중(OR 1.5, 95% CI 1.2-2.1), 하지 허혈성 증상(OR 2.69, 95% CI 1.98-3.23)에서 뚜렷한 연관성을 보였다. MA 환자 또한 연관

성을 보였으며, MO 환자는 심근경색과 하지 허혈성 증상에 대해서는 연관이 있으나, 뇌졸중과는 연관성이 없었다(Table 2).

#### 고 찰

편두통과 CVD 발생은 여러 연구에서 논의된 바 있다. 일과성 허혈발작, 허혈성 뇌졸중, 무증상 뇌병변과 MA의 연관성은 환자-대조군 연구(case-control study), 단면조사 연구(cross-sectional study)에서 언급되었고,<sup>25-27</sup> 대규모 추적 연구(large longitudinal study)에서도 관찰되었다.<sup>34,28</sup>

편두통(주로 MA)과 허혈성 뇌졸중의 연관성이 알려지면서, 관상동맥 질환과도 유사한 연관성이 있는지에 대하여 흥미를 갖게 되었다. 일부 연구<sup>29</sup>에서는 연관이 없는 것으로 나타나기도 하였으나, 증례 보고<sup>30</sup>와 코호트 연구<sup>3</sup>에서는 편두통과 흉통, 심전도의 허혈성 변화와 관련이 있다고 보고하기도 하였다.<sup>31</sup> 최근 인구 집단을 대상으로 한 3개의 연구에서 MA와 관상동맥 질환의 관계를 보고하였다.<sup>32-9</sup> 또한, 편두통 환자들에서 혈관성 질환의 무증상 표지자들이 변화된다고 보고하기도 하였다.<sup>10</sup>

본 연구 결과의 일부는 이전에 시행된, 인구 집단을 대상으로 한 연구의 결과를 확실히 하여주나, 결과의 일부는 논란이 되고 있는 부분에 대한 정보를 제공하기도 하였다. 연구 결과는, MA가 뇌졸중 뿐만 아니라 심장발작과 하지 허혈성 증상의 위험인자로도 작용하고, CVD의 위험인자(특히 당뇨, 고혈압, 고 콜레스테롤 혈증)가 발생할 요인으로도 작용한다는 사실이다. MO는 심장발작(뇌졸중 제외)과 CVD의 위험인자와 연관이 있다는 것을 분명히 보여준다. CVD의 발생과 관련하여, MO는 MA에 비하여 발생 위험 정도가 더 낮긴 하지만, 발생 위험은 존재한다. CVD의 위험인자에 대하여 MA, MO 간 차이는 더 작은 것으로 나타났다. MO가 있는 환자들은 MA 환자들과 마찬가지로 수정 Framingham 점수로 평가한 CVD의 발생 위험은 대조군보다 더 높았다.

편두통과 허혈성 혈관성 질환을 연결짓는 매커니즘은 아직 복잡하고 분명하지 않다.<sup>32</sup> 피질 확산성 억제(cortical spreading depression), 전조의 추정 기질(presumed substrate) 등이 뇌 병변에 직접적으로 영향을 줄 수 있다는 보고가 있고, MA가 지속적으로 뇌허혈(cerebral ischemia)의 위험인자일 가능성을 고려할 수 있다. 그러나, 심장발작이나 하지

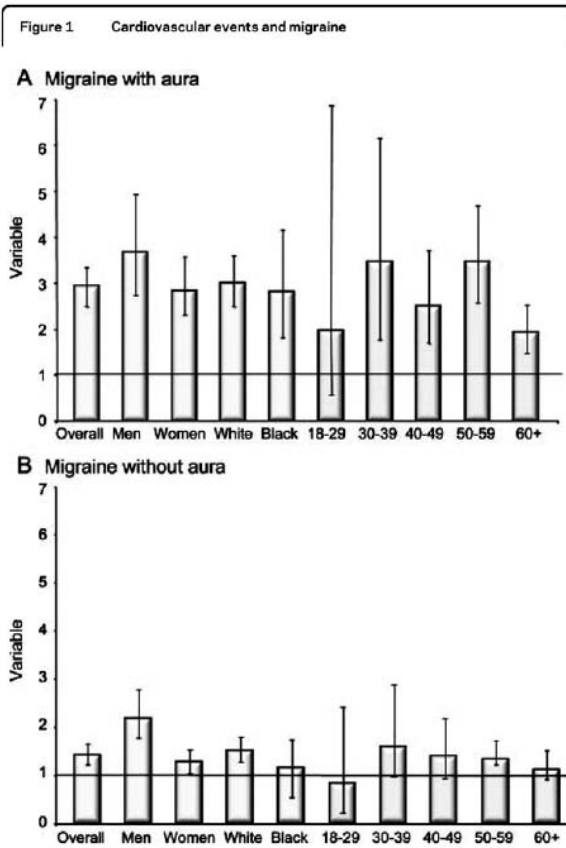

Odds ratios of reporting any cardiovascular event in individuals with migraine with aura (A) and migraine without aura (B). Bars represent the odds ratios and whiskers represent the confidence intervals.

Figure 2 Cardiovascular risk and migraine

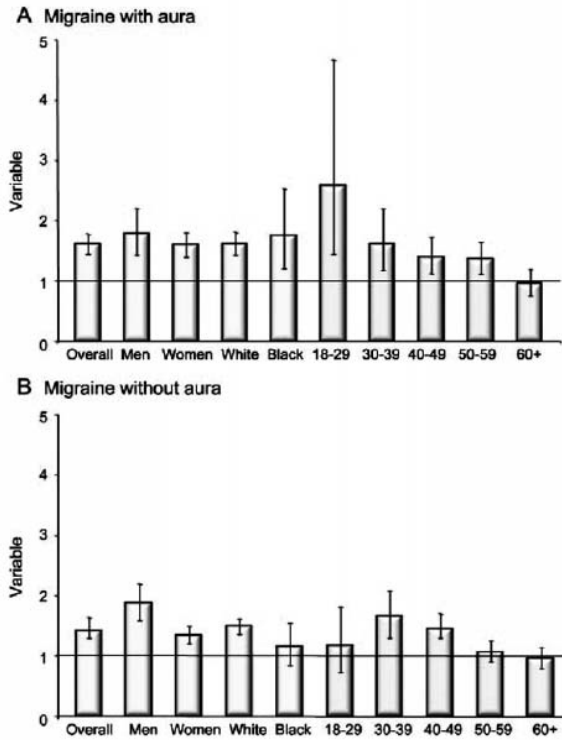

Odds ratios of reporting at least 2 risk factors for cardiovascular events in individuals with migraine with aura (A) and migraine without aura (B). Bars represent the odds ratios and whiskers represent the confidence intervals.

허혈성 증상에서는 다른 인자들이 중요한 역할을 하게 된다(즉, 전반적 죽상 경화증과 연관되어 있거나<sup>10</sup> CVD의 위험인자들과 동반 이환되어 있는 편두통<sup>11</sup>). 이러한 연관성에 대한 원인적 관계나 병태 생리학에 대한 이해가 중요하다. 그럼에도 불구하고, 연관성에 대한 메커니즘에 관한 지식이 제한적이어서, 본 연구의 결과들은 편두통의 개념적 패러다임의 변화가 중요할 것이라는 것을 보여준다. MA 환자들만이 CVD의 위험이 높기 때문에, 환자들의 대부분(특히 MO 환자들)은 안전하다고 알려져 왔다.<sup>33</sup> 전조의 유무와 상관없이 대부분의 편두통 환자들이 안전하다는 점에는 동의하나, CVD의 위험은 존재한다. 앞으로의 연구들은 편두통 환자들, 특히 위험도가 높은 환자들 규명에 집중하여야 할 것이다. 예를 들어 두통의 빈도, 심한 정도, 전조의

발생 빈도 및 여러 위험인자들의 누적 발생의 중요성을 평가하여야 할 것이다. 둘째로, 편두통 치료가 CVD의 위험을 어떻게 변화시킬 수 있는지 평가하는 것이 중요하다. 예를 들어 전조의 빈도가 CVD 발생의 위험을 증가시킨다면, 편두통 예방 치료는 위험을 감소시킬 수 있을 것이다. 특히 일부 항염증제의 경우 CVD의 위험을 높이고,<sup>34</sup> 에르고트(ergot)가 포함된 약제는 혈관을 수축시킨다<sup>35</sup>는 것을 고려하여, CVD 발생 위험을 감소시키거나 증가시키는 급성기 치료의 적절성에 대한 평가가 이루어져야 할 것이다. 그렇지 않다면, 편두통 치료에 있어서 심혈관 보호 약물의 중요성에 대한 평가를 해볼 수도 있다.<sup>36</sup> 마지막으로, 이러한 사실들을 바탕으로, 임상에는 편두통 환자들의 변형 심혈관 위험인자들, 예를 들어 비만, 고혈압, 고지혈증, 당뇨와 같은 위험인자들에 대하여 경각심을 가지고 접근하여야 한다. 아울러, 대사 증후군(metabolic syndrome)과 편두통의 동반 이환도 고려하여야 한다.<sup>37</sup>

본 연구에는 몇 가지 제한점이 있다. 먼저, 두통의 진단이 임상적 접근이 아니라 설문지에 근거하여 이루어졌다는 점이다. 저자들이 사용한 설문지는 검증이 잘 되어 있고 민감도와 특이도가 매우 높은 편이지만,<sup>38</sup> 어느 정도의 진단 오류가 발생할 수 있다. 그러나 이러한 오류가 이 연구에서 나타난 뚜렷한 양성 연관성을 설명하는 데 문제가 되지는 않을 것이다. 둘째로, CVD 발생과 위험인자의 평가 또한 의학적인 진단을 자가 보고에 근거하여 조사하였다는 점이다. 이 방법 또한 질환 발생의 판단 정도를 통해 입증되어 왔으며, 널리 사용되고 있는 방법이다.<sup>32</sup> 그러나 저자들은 앞으로 수행할 연구에 대한 준비로서 이 방법의 유효성을 재검증하기 위해 질환 발생의 판단 정도에 대한 조정이 필요할 것이다. CVD의 위험으로 작용할 만한 많은 다른 인자들이 설문지 조사의 한계 때문에 수집되지 못하였다. 특히 피임제나 호르몬 대체 요법(hormone replacement therapy)의 영향을 포함하지 못하였다. 그러나 본 연구의 결과는 남성에서 뚜렷한 양성 결과를 보였기 때문에, 편두통 환자와 대조군에서 피임제나 호르몬 대체 요법의 빈도의 차이가 없다면 결과 편향(bias)의 가능성은 높지 않을 것이다. 또한 일부 비교, 특히 소그룹 간의 비교에서 CVD 발생 빈도가 적어 분석 결과에 신뢰성이 높지 않을지도 모른다. 이 연구의 표본 수가 크기 때문에, 비록 통계적으로 유의하게 차이가 있었던 일부 결과들은 임상적으로 적절하지 않을 수도 있

Figure 3 Framingham scores

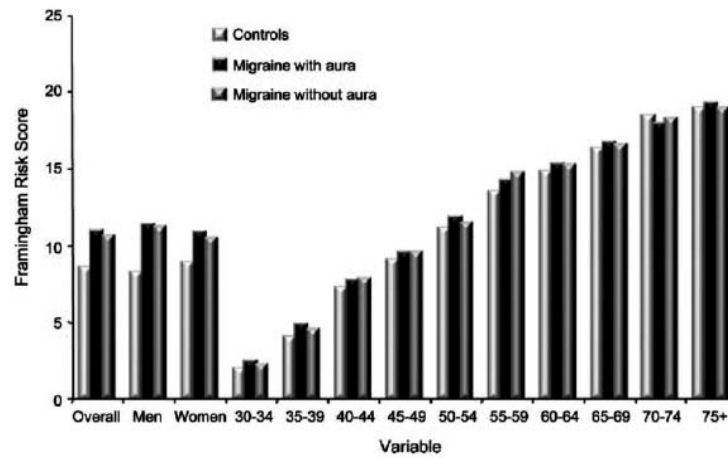

Mean Framingham scores of participants as a function of their headache status and of demographics. Stratification is by age in years.

다. 마지막으로, CVD의 위험인자가 있는 환자들이 그렇지 않은 환자들보다 더 자주 의사를 방문하고, 따라서 편두통으로 진단받을 기회가 더 많았을 것이라는 점이 이 연구의 제한점이 될 것이다.

본 연구의 강점은 두통의 양상과 매우 잘 입증된 도구를 사용하여 평가하였으며 코호트의 특성이 적절하였고, 대조군은 두통이 없다는 사실이 신뢰성이 높으며(2004년과 연구 시작 시 두 번 조사하였다), 샘플 크기에서도 신뢰성(robustness)을 보였다는 점이다.

MA, MO 환자들이 모두 CVD와 그 위험인자들과 연관이 있다. 그러므로 이러한 연관성을 인지하여 환자를 파악하고, 특히 고위험 환자들을 선별하여 편두통 뿐만 아니라 궁극적으로 편두통으로 인하여 발생하는 합병증 예방을 목표로 하는 치료 계획을 세워야 할 것이다.

#### DISCLOSURE

Dr. Bigal has served on scientific advisory boards for Merck & Co. Inc., GlaxoSmithKline, AstraZeneca, and OMP; serves as Co-editor of the Abstract Section of *Headache*; has served on speakers' bureaus for and received speaker honoraria from Merck & Co. Inc., Pfizer Inc., and OMP; is a full-time employee of and holds stock and stock options in Merck & Co. Inc.; and has received research support from the National Headache Foundation and the American Headache Society. Dr. Kurth has received funding for travel from the Restless Legs Syndrome Foundation; serves as a consultant to 13 Drug Safety and World Health Information Science Consultants, LLC; has received honoraria from Genzyme Corporation, Merck Serono, and Pfizer Inc. for educational lectures and has received research support from McNeil Consumer & Specialty Pharmaceuticals, Merck Serono, Wyeth, the NIH [HL091880-01 (PI) and NS061836-01 (PI)], the French National Research Agency, and the Migraine Research Foundation. Dr. Santanello serves as a reviewer for foundation grants and fellowship awards for PhRMA Foundation; is a full-time employee (Vice President of Epidemiology) of and holds stock and stock option in Merck & Co., Inc.; and in his position as Vice President of Epidemiology has acted as a witness in legal proceedings. Dr. Buse has served on a scientific advisory board for ENDO Pharmaceuticals. Dr. Golden is a full-time employee of and holds stock option in Merck & Co., Inc. Dr. Robbins received a Kirschstein National Service Research Award (training grant in geriatrics). Dr. Lipton serves/has served on scientific advisory boards for and received funding for travel from Bayer Schering Pharma, Merck Serono, GlaxoSmithKline, Endo Pharmaceuticals, Kowa Pharmaceuticals America, Inc., Allergan, Inc., Neurialieve Inc., Ortho-McNeil-Janssen Pharmaceuticals, Inc.; has received funding for travel from the American Headache Society and the Diamond Headache Center; serves as Associate Editor of *Cephalalgia* and on the editorial boards of *Neurology*<sup>®</sup> and *Headache*; receives royalties from publishing *Headache in Clinical Practice* (Isis Medical Media, 2002), *Headache in Primary Care* (Isis Medical Media, 1999), *Wolff's Headache* (Oxford University Press, 2001, 2008), *Managing Migraine: A Physician's Guide* (BC Decker, 2008), and *Managing Migraine: A Patient's Guide* (BC Decker, 2008); has received speaker honoraria from the National Headache Foundation, the University of Oklahoma, the American Academy of Neurology, the Annenberg Foundation, Merck Serono, GlaxoSmithKline, and Coherex Medical; receives research support from the American Headache Society, National Headache Foundation, the Migraine Research Foundation, and

Table 2 Main effect of migraine and of migraine subtypes in CVD outcomes after adjustments\*

| CVD outcome           | Migraine vs control, OR (95% CI) | MA vs control, OR (95% CI) | MO vs control, OR (95% CI) |
|-----------------------|----------------------------------|----------------------------|----------------------------|
| Myocardial infarction | 2.16 (1.70-2.76)                 | 2.86 (2.14-3.82)           | 1.85 (1.41-2.42)           |
| Stroke                | 1.54 (1.16-2.05)                 | 2.78 (2.02-3.84)           | 0.97 (0.69-1.36)           |
| Claudication          | 2.69 (1.98-3.23)                 | 4.61 (3.10-6.12)           | 3.11 (1.75-6.23)           |

Abbreviations: CI = confidence interval; CVD = cardiovascular disease; MA = migraine with aura; MO = migraine without aura; OR = odds ratio.  
\*See Methods for adjustments and list of covariates.

the NIH [PO1AG03949 (Program Director, Project Leader), PO1AG027734 (Project Leader), RO1AG25119 (Co-I), K23AG030857 (Co-Mentor), K23NS05140901A1 (Co-Mentor), and K23NS47256 (Mentor)]; and holds stock options in Minster Pharmaceuticals plc.

Received May 31, 2009. Accepted in final form October 9, 2009.

## REFERENCES

- Elliott D. Migraine and stroke: current perspectives. *Neurol Res* 2008;30:801–812.
- Kruit MC, van Buchem MA, Hofman PA, et al. Migraine as a risk factor for subclinical brain lesions. *JAMA* 2004; 291:427–434.
- Kurth T, Slomke MA, Kase CS, et al. Migraine, headache, and the risk of stroke in women: a prospective study. *Neurology* 2005;64:1020–1026.
- MacClellan LR, Mitchell BD, Cole JW, et al. Familial aggregation of ischemic stroke in young women: the Stroke Prevention in Young Women Study. *Genet Epidemiol* 2006;30:602–608.
- Kruit MC, Launer LJ, Ferrari MD, van Buchem MA. Brain stem and cerebellar hyperintense lesions in migraine. *Stroke* 2006;37:1109–1112.
- Kurth T, Diener HC. Current views of the risk of stroke for migraine with and without aura. *Curr Pain Headache Rep* 2006;10:214–220.
- Kurth T, Gaziano JM, Cook NR, Logroscino G, Diener HC, Buring JE. Migraine and risk of cardiovascular disease in women. *JAMA* 2006;296:283–291.
- Kurth T, Gaziano JM, Cook NR, et al. Migraine and risk of cardiovascular disease in men. *Arch Intern Med* 2007; 167:795–801.
- Rose KM, Carson AP, Sanford CP, et al. Migraine and other headaches: associations with Rose angina and coronary heart disease. *Neurology* 2004;63:2233–2239.
- Rose KM, Wong TY, Carson AP, Couper DJ, Klein R, Sharrett AR. Migraine and retinal microvascular abnormalities: the Atherosclerosis Risk in Communities Study. *Neurology* 2007;68:1694–1700.
- Scher AI, Terwindt GM, Picavet HS, Verschuren WM, Ferrari MD, Launer LJ. Cardiovascular risk factors and migraine: the GEM population-based study. *Neurology* 2005;64:614–620.
- Scher AI, Terwindt GM, Verschuren WM, et al. Migraine and MTHFR C677T genotype in a population-based sample. *Ann Neurol* 2006;59:372–375.
- Schürks M, Zee RY, Buring JE, Kurth T. Polymorphisms in the renin-angiotensin system and migraine in women. *Headache* 2009;49:292–299.
- Schürks M, Zee RY, Buring JE, Kurth T. Interrelationships among the MTHFR 677C>T polymorphism, migraine, and cardiovascular disease. *Neurology* 2008;71: 505–513.
- Lipton RB, Bigal ME, Diamond M, Freitag F, Reed ML, Stewart WF. Migraine prevalence, disease burden, and the need for preventive therapy. *Neurology* 2007;68:343–349.
- Stewart WFRM, Bigal ME, Lipton RB. Lifetime migraine incidence results from the American Migraine Prevalence and Prevention study. *Headache* 2005;46:52.
- Diamond S, Bigal ME, Silberstein S, Loder E, Reed M, Lipton RB. Patterns of diagnosis and acute and preventive treatment for migraine in the United States: results from the American Migraine Prevalence and Prevention study. *Headache* 2007;47:355–363.
- Bigal ME, Lipton RB. Excessive acute migraine medication use and migraine progression. *Neurology* 2008;71: 1821–1828.
- Lipton RB, Stewart WF, Diamond S, Diamond ML, Reed M. Prevalence and burden of migraine in the United States: data from the American Migraine Study II. *Headache* 2001;41:646–657.
- The International Classification of Headache Disorders, 2nd edition. *Cephalalgia* 2004;24(suppl 1):1–149.
- Bigal ME, Serrano D, Reed M, Lipton RB. Chronic migraine in the population: burden, diagnosis, and satisfaction with treatment. *Neurology* 2008;71:559–566.
- D'Agostino RB Sr, Vasan RS, Pencina MJ, et al. General cardiovascular risk profile for use in primary care: the Framingham Heart Study. *Circulation* 2008;117:743–753.
- Lloyd-Jones DM, Wilson PW, Larson MG, et al. Framingham risk score and prediction of lifetime risk for coronary heart disease. *Am J Cardiol* 2004;94:20–24.
- Gramling R, Klein W, Roberts M, Waring ME, Gramling D, Eaton CB. Self-rated cardiovascular risk and 15-year cardiovascular mortality. *Ann Fam Med* 2008;6:302–306.
- Erminan M, Takkouche B, Isorna FC, Samii A. Risk of ischaemic stroke in people with migraine: systematic review and meta-analysis of observational studies. *BMJ* 2005;330:63.
- Buring JE, Hebert P, Romero J, et al. Migraine and subsequent risk of stroke in the Physicians' Health Study. *Arch Neurol* 1995;52:129–134.
- Diener HC, Kurth T. Is migraine a risk factor for stroke? *Neurology* 2005;64:1496–1497.
- Porter A, Gladstone JP, Dodick DW. Migraine and white matter hyperintensities. *Curr Pain Headache Rep* 2005;9: 289–293.
- Rosamond W. Are migraine and coronary heart disease associated? An epidemiologic review. *Headache* 2004;44 suppl 1:S5–S12.
- Wayne VS. A possible relationship between migraine and coronary artery spasm. *Aust NZ J Med* 1986;16:708–710.
- Uyarel H, Erden I, Cam N. Acute migraine attack, anginalike chest pain with documented ST-segment elevation and slow coronary flow. *Acta Cardiol* 2005;60:221–223.
- Bigal ME, Kurth T, Hu H, Santanello N, Lipton RB. Migraine and cardiovascular disease: possible mechanisms of interaction. *Neurology* 2009;72:1864–1871.
- Bigal M, Kurth T, Hu H, Santanello N, Lipton R. Migraine and cardiovascular disease: possible mechanisms of interaction. *Neurology* 2009;72:1864–1871.
- Chan AT, Manson JE, Albert CM, et al. Nonsteroidal antiinflammatory drugs, acetaminophen, and the risk of cardiovascular events. *Circulation* 2006;113:1578–1587.
- Hargreaves RJ. Pharmacology and potential mechanisms of action of rizatriptan. *Cephalalgia* 2000;20 suppl 1:2–9.
- Bigal ME, Sheftell FD, Tepper SJ, Rapoport AM. Migraine and silent infarcts. Are we making the proper decisions? *Cephalalgia* 2006;26:629–630.
- Cavestro C, Rosatello A, Micca G, et al. Insulin metabolism is altered in migraineurs: a new pathogenic mechanism for migraine? *Headache* 2007;47:1436–1442.
- Lipton RB, Stewart WF, Simon D. Medical consultation for migraine: results from the American Migraine Study. *Headache* 1998;38:87–96.
